# Supplementary material
Source: PubMed Central journal article supplement (PMC2773058)
Supplement: pp.109.142190_1.pdf [file pp.109.142190_1.pdf]

**Supplemental Fig. S1. Expected segregation ratios for one vs. three cells contributing to gamete formation in an individual flower.**

**One germline cell contributes to gamete formation in an individual flower:**

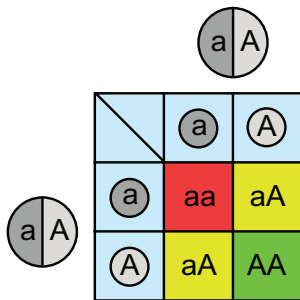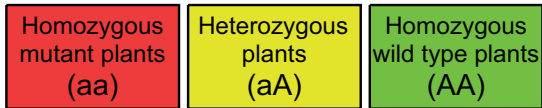

**1 : 2 : 1**

**Three germline cells contribute to gamete formation in an individual flower:**

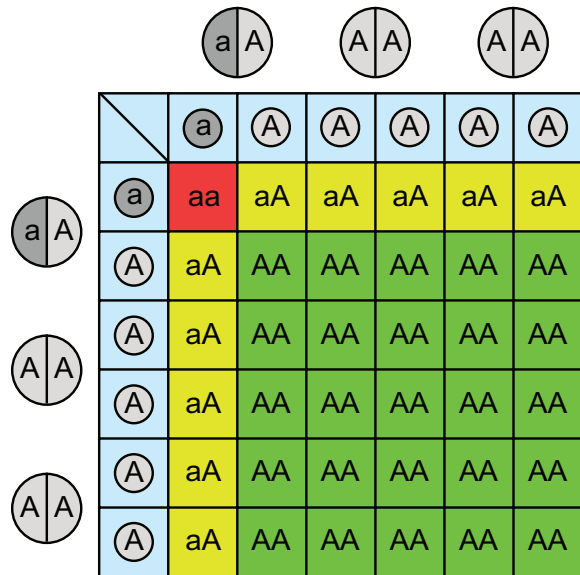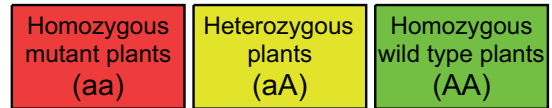

**1 : 10 : 25**

In *Arabidopsis*, gametes in individual flowers are formed as offspring from a single germline cell (Greene et al., 2003). Therefore, a 1:2:1 segregation between homozygous mutant vs. heterozygous vs. homozygous wild type plants is observed in the M<sub>2</sub> offspring of a mutagenized embryo with respect to a single locus (Greene et al., 2003; left). The observed 1:10 ratio between homozygous mutant and heterozygous plants in *Lotus* could be explained by the presence of 3 germline cells in an individual flower, producing to six types of gametes in the male and female reproductive organs (right).

**Supplemental Fig. S2. Overview of mutant alleles in nodulation genes identified by TILLING.**

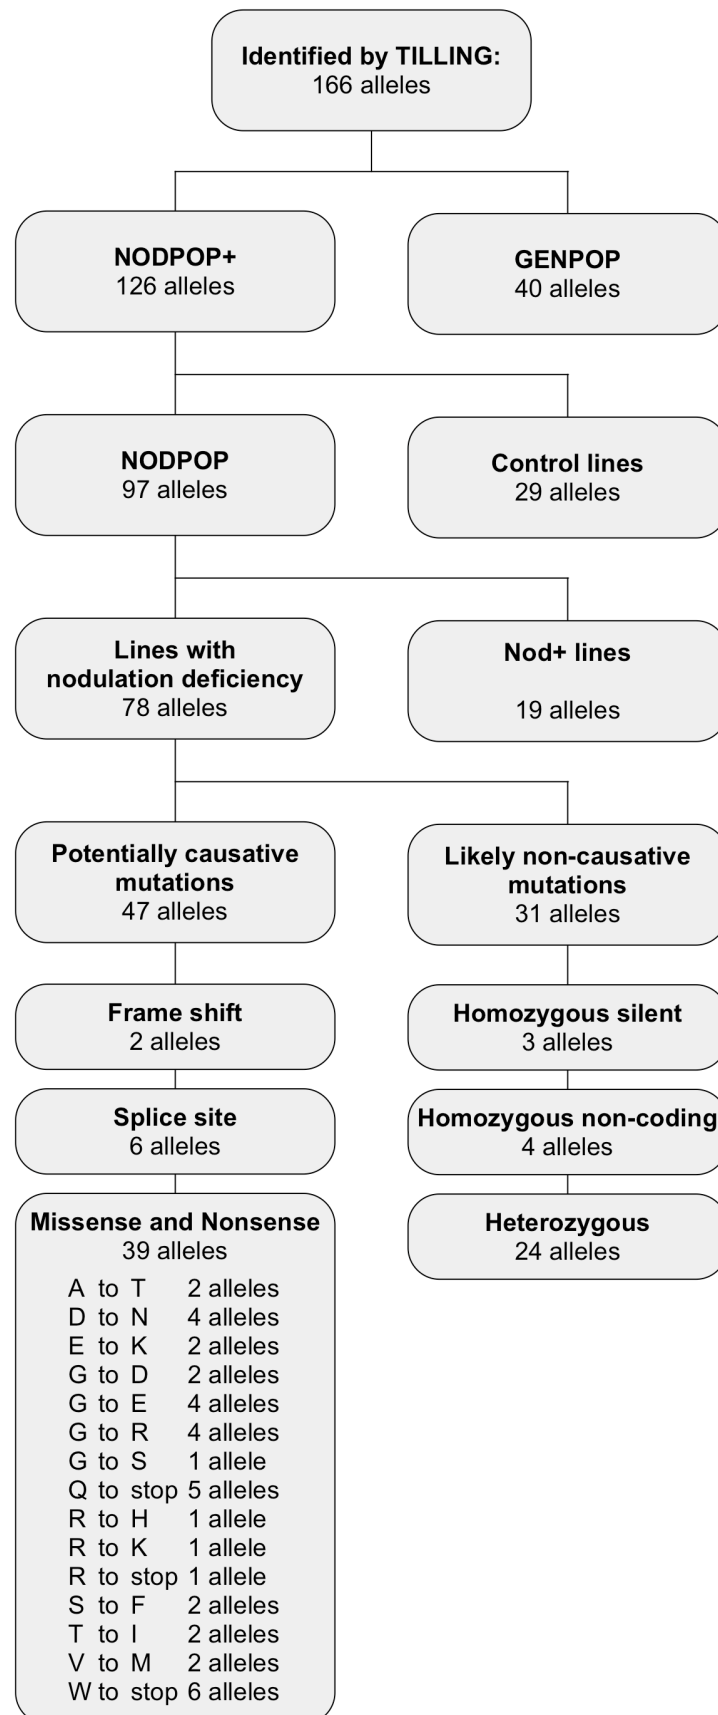

## Supplemental Fig. S3:

### Allelic series of symbiosis genes in *Lotus japonicus*

|                      |         |
|----------------------|---------|
| <i>CASTOR</i> .....  | page 2  |
| <i>CCaMK</i> .....   | page 4  |
| <i>CYCLOPS</i> ..... | page 5  |
| <i>NFR1</i> .....    | page 6  |
| <i>NFR5</i> .....    | page 7  |
| <i>NIN</i> .....     | page 8  |
| <i>NSP1</i> .....    | page 9  |
| <i>NSP2</i> .....    | page 10 |
| <i>NUP85</i> .....   | page 11 |
| <i>NUP133</i> .....  | page 12 |
| <i>POLLUX</i> .....  | page 13 |
| <i>SYMRK</i> .....   | page 15 |
| References.....      | page 18 |

Coding regions are indicated by grey boxes, non-coding regions by thin lines. Symbols above and below the genes specify the mutation position and type of the respective alleles:

|                |                                                                                  |
|----------------|----------------------------------------------------------------------------------|
| red octagons   | stop mutations                                                                   |
| red diamonds   | splice site mutations                                                            |
| red squares    | deletions or insertions                                                          |
| blue triangles | single amino acid changes                                                        |
| green circles  | mutations leading to synonymous exchanges<br>or mutations in non-coding regions. |

Thick black lines at the bottom indicate the regions covered by separate TILLING reactions.

Phenotype information in the tables is given for the respective progenitor/mutant line. Cases where lines harbour more than one mutation in nodulation genes are explained in footnotes.

**CASTOR**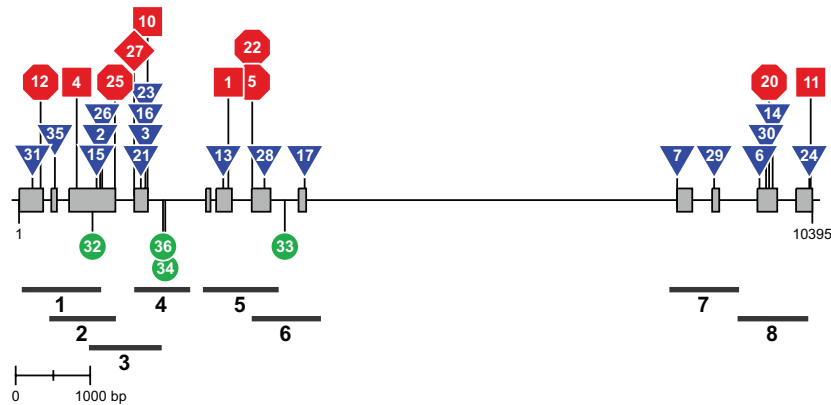

| Allele                        | Progenitor/ mutant line         | Previous name  | Genomic mutation <sup>a</sup>                 | Effect                                      | Nodulation phenotype <sup>b</sup> | AM phenotype <sup>b</sup> | Detected by TILLING | Genotype of M <sub>2</sub> plant <sup>c</sup> | Reference                                          |
|-------------------------------|---------------------------------|----------------|-----------------------------------------------|---------------------------------------------|-----------------------------------|---------------------------|---------------------|-----------------------------------------------|----------------------------------------------------|
| <i>castor-1</i>               | 282-227                         | <i>sym4-1</i>  | A <sub>2776</sub> -C <sub>2781</sub> deletion | L <sub>479</sub> -A <sub>480</sub> deletion | -                                 | -                         |                     |                                               | Imaizumi-Anraku et al., 2005; Kistner et al., 2005 |
| <i>castor-2</i>               | EMS1749                         | <i>sym4-2</i>  | G <sub>1057</sub> to A                        | A <sub>264</sub> to T                       | -                                 | -                         | NONPOP+             | HOM                                           | Imaizumi-Anraku et al., 2005; Kistner et al., 2005 |
| <i>castor-3</i> <sup>d</sup>  | EMS46                           | <i>sym22-1</i> | G <sub>1655</sub> to A                        | G <sub>383</sub> to E                       | -                                 | -                         | NODPOP+             | HOM                                           | Imaizumi-Anraku et al., 2005; Kistner et al., 2005 |
| <i>castor-4</i>               | 25-5A                           | <i>sym71-1</i> | C <sub>778</sub> del.                         | frame shift                                 | -                                 | n.d.                      |                     |                                               | Imaizumi-Anraku et al., 2005                       |
| <i>castor-5</i> <sup>e</sup>  | 24-8B; SL1937-2                 | <i>sym71-2</i> | G <sub>3053</sub> to A                        | W <sub>483</sub> to stop                    | -;-                               | n.d.;                     |                     |                                               | Imaizumi-Anraku et al., 2005; this work            |
| <i>castor-6</i>               | N5                              |                | C <sub>9886</sub> to T                        | P <sub>698</sub> to L                       | -                                 | n.d.                      |                     |                                               | Imaizumi-Anraku et al., 2005                       |
| <i>castor-7</i>               | N10                             |                | G <sub>9823</sub> to A                        | V <sub>598</sub> to I (splice site?)        | -                                 | n.d.                      |                     |                                               | Imaizumi-Anraku et al., 2005                       |
| <i>castor-8</i>               | G00472                          |                | > 20 kb deletion                              | CASTOR deletion                             | -                                 | n.d.                      |                     |                                               | Imaizumi-Anraku et al., 2005                       |
| <i>castor-9</i>               | G00716                          |                | > 20 kb deletion                              | CASTOR deletion                             | -                                 | n.d.                      |                     |                                               | Imaizumi-Anraku et al., 2005                       |
| <i>castor-10</i>              | G00862                          |                | 117 bp deletion from exon 4 to intron 4       | frame shift                                 | -                                 | n.d.                      |                     |                                               | Imaizumi-Anraku et al., 2005                       |
| <i>castor-11</i>              | M89-27                          |                | T <sub>10371</sub> del.                       | frame shift                                 | -                                 | n.d.                      |                     |                                               | Imaizumi-Anraku et al., 2005                       |
| <i>castor-12</i>              | SL3251-2                        |                | G <sub>279</sub> to A                         | W <sub>93</sub> to stop                     | -                                 | -                         | NODPOP              | HOM                                           | Imaizumi-Anraku et al., 2005                       |
| <i>castor-13</i>              | SL0820 <sup>f</sup> -2,3        |                | G <sub>2672</sub> to A                        | D <sub>444</sub> to N                       | (-), (-)                          | n.d., (-)                 | both in NODPOP      | HET, HOM                                      | Imaizumi-Anraku et al., 2005                       |
| <i>castor-14</i>              | SL1715-2,3,4,5,6                |                | G <sub>9871</sub> to A                        | A <sub>760</sub> to T                       | -*, -, *, -, *, -*                | n.d., -, n.d., n.d., n.d. | all in NODPOP       | all HOM                                       | Imaizumi-Anraku et al., 2005                       |
| <i>castor-15</i>              | SL1966-3                        |                | C <sub>1013</sub> to T                        | T <sub>249</sub> to I                       | -                                 | -                         | NODPOP              | HOM                                           | Imaizumi-Anraku et al., 2005                       |
| <i>castor-16</i> <sup>d</sup> | SL3160-3                        |                | G <sub>1655</sub> to A                        | G <sub>383</sub> to E                       | -                                 | -                         | NODPOP              | HOM                                           | Imaizumi-Anraku et al., 2005                       |
| <i>castor-17</i>              | SL6812-2                        |                | G <sub>3738</sub> to A                        | R <sub>590</sub> to H                       | +/-                               | -                         | NODPOP              | HOM                                           | Imaizumi-Anraku et al., 2005                       |
| <i>castor-18</i>              | KL549                           |                | n.d.                                          | n.d.                                        | -                                 | n.d.                      |                     |                                               | Sandal et al., 2006                                |
| <i>castor-19</i>              | G00532-21                       |                | >90 kb del.                                   | CASTOR del.                                 | -                                 | n.d.                      |                     |                                               | Sandal et al., 2006                                |
| <i>castor-20</i>              | LKL186-4                        |                | C <sub>9827</sub> to G                        | S <sub>745</sub> to stop                    | -                                 | n.d.                      | NODPOP+             | HOM                                           | Sandal et al., 2006                                |
| <i>castor-21</i>              | B32-BA <sup>f</sup>             |                | G <sub>1594</sub> to A                        | E <sub>363</sub> to K                       | (-)                               | (+)                       |                     |                                               | Murray et al., 2006                                |
| <i>castor-22</i> <sup>e</sup> | S41-1 <sup>g</sup> ; SL1937-2   |                | G <sub>3053</sub> to A                        | W <sub>483</sub> to stop                    | (-);-                             | (+);-                     |                     |                                               | Murray et al., 2006                                |
| <i>castor-23</i> <sup>d</sup> | B5-2 <sup>g</sup>               |                | G <sub>1655</sub> to A                        | G <sub>383</sub> to E                       | (-)                               | (-)                       |                     |                                               | Murray et al., 2006                                |
| <i>castor-24</i>              | B68-B <sup>g</sup> <sup>h</sup> |                | G <sub>10353</sub> to A                       | W <sub>840</sub> to stop                    | (-)                               | (-)                       |                     |                                               | Murray et al., 2006; this work                     |
| <i>castor-25</i>              | S46-1 <sup>i</sup>              |                | G <sub>1251</sub> to A                        | W <sub>328</sub> to stop                    | (-)                               | (-)                       | NODPOP+             | HOM                                           | Murray et al., 2006                                |

|                  |                            |                        |                       |       |             |               |         |                                                            |
|------------------|----------------------------|------------------------|-----------------------|-------|-------------|---------------|---------|------------------------------------------------------------|
| <i>castor-26</i> | SL6908-2                   | G <sub>1088</sub> to A | G <sub>274</sub> to D | -     | -           | NODPOP        | HOM     | this work                                                  |
| <i>castor-27</i> | SL5136-3                   | G <sub>1503</sub> to A | splice site           | -     | -           | NODPOP        | HOM     | this work                                                  |
| <i>castor-28</i> | 282-643M1M1M3 <sup>k</sup> | A <sub>3214</sub> to G | D <sub>537</sub> to G | (-)   | n.d.        | NODPOP+       | HOM     | N. Sandal and J. Stougaard, pers. communication; this work |
| <i>castor-29</i> | SL5210-13                  | G <sub>9106</sub> to A | E <sub>672</sub> to K | -*    | n.d.        | NODPOP        | HET     | this work                                                  |
| <i>castor-30</i> | SL1415-2,3,4               | G <sub>9785</sub> to A | S <sub>731</sub> to N | -,*,* | -,n.d.,n.d. | all in NODPOP | all HET | this work                                                  |
| <i>castor-31</i> | SL5768-3                   | C <sub>172</sub> to G  | R <sub>58</sub> to G  | +/-*  | n.d.        |               |         | this work                                                  |
| <i>castor-32</i> | SL6453-2                   | T <sub>960</sub> to A  | V <sub>231</sub> to V | -     | n.d.        |               |         | this work                                                  |
| <i>castor-33</i> | SL1371-2                   | G <sub>3481</sub> to A | intron 7              | -*    | n.d.        | NODPOP        | HET     | this work                                                  |
| <i>castor-34</i> | SL6077-2                   | G <sub>1915</sub> to A | intron 4              | +/-*  | n.d.        | NODPOP        | HOM     | this work                                                  |
| <i>castor-35</i> | SL1052-1                   | G <sub>488</sub> to A  | E <sub>122</sub> to K | n.d.  | n.d.        | GENPOP        | HET     | this work                                                  |
| <i>castor-36</i> | SL0818-1                   | C <sub>3354</sub> to T | intron 7              | n.d.  | n.d.        | GENPOP        | HET     | this work                                                  |

<sup>a</sup> The *CASTOR* genomic sequence is deposited to GenBank under accession number AB162016 and is used as *Lotus japonicus* Gifu reference. Adenine of the ATG initiator codon is designated as position 1.

<sup>b</sup> Phenotypes that are scored only in the initial M<sub>2</sub> generation are denoted by \*; no star stands for additional screening in the M<sub>3</sub> generation. In the nodulation phenotype "+/-" designates reduced nodule number, smaller size or white colour. Annotations in brackets indicate lines harbouring more than one mutation in nodulation genes.

<sup>c</sup> Genotype of progenitor or mutant plant in the M<sub>2</sub> generation is given as HOM = homozygous or HET = heterozygous with respect to the mutant allele.

<sup>d</sup> *castor-3*, *castor-16* and *castor-23* are identical alleles.

<sup>e</sup> *castor-5* and *castor-22* are identical alleles.

<sup>f</sup> Lines SL0820-2,3 carry the mutant alleles *castor-13* and *ccamk-8*.

<sup>g</sup> Lines contain in addition a *har1-1* mutation.

<sup>h</sup> Line B68-B carries an additional heterozygous mutation A<sub>3029</sub> to G in intron 6.

<sup>i</sup> Line S46-1 carries the mutant alleles *castor-25*, *nin-10*, and *har1-1*.

<sup>k</sup> Line 282-643M1M1M3 carries the mutant alleles *castor-28*, *ccamk-7*, and *nup85-9*.

**CCaMK**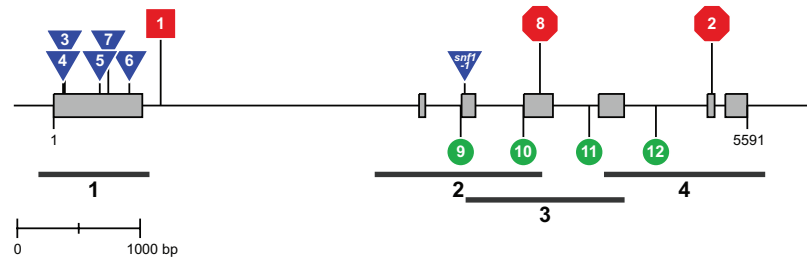

| Allele          | Progenitor/<br>mutant line     | Previous<br>name | Genomic<br>mutation <sup>a</sup>                      | Effect       | Nodulation<br>phenotype <sup>b</sup> | AM phenotype <sup>b</sup> | Detected by<br>TILLING | Genotype of<br>M <sub>2</sub> plant <sup>c</sup> | Reference                                                                 |
|-----------------|--------------------------------|------------------|-------------------------------------------------------|--------------|--------------------------------------|---------------------------|------------------------|--------------------------------------------------|---------------------------------------------------------------------------|
| <i>ccamk-1</i>  | 282-1078                       | <i>sym15-1</i>   | tandem repeat<br>insertion of frag-<br>ment G564-T862 | intron 1     | +/-                                  | n.d.                      |                        |                                                  | Schauser et al., 1998; Demchenko<br>et al., 2004; Tirichine et al., 2006a |
| <i>ccamk-2</i>  | cac57.3                        | <i>sym15-2</i>   | G5307 to T                                            | E453 to stop | -                                    | n.d.                      |                        |                                                  | Demchenko et al., 2004; Kistner<br>et al., 2005; Tirichine et al., 2006a  |
| <i>ccamk-3</i>  | 8-1G                           | <i>sym72</i>     | G89 to A                                              | G30 to E     | -                                    | n.d.                      |                        |                                                  | Senoo et al., 2000; Kawaguchi<br>et al., 2002; Tirichine et al., 2006a    |
| <i>ccamk-4</i>  | N20                            |                  | C75 to T                                              | S25 to F     | n.d.                                 | n.d.                      |                        |                                                  | Tirichine et al., 2006a                                                   |
| <i>ccamk-5</i>  | B91-B <sup>d</sup>             |                  | G371 to A                                             | G124 to D    | (-)                                  | (-)                       | NODPOP+                | HOM                                              | Murray et al., 2006                                                       |
| <i>ccamk-6</i>  | S95-B <sup>d</sup>             |                  | G610 to A                                             | G204 to R    | (-)                                  | (-)                       | NODPOP+                | HOM                                              | Murray et al., 2006                                                       |
| <i>ccamk-7</i>  | 282-<br>643M1M1M3 <sup>e</sup> |                  | C439 to T                                             | R147 to C    | (-)                                  | n.d.                      | NODPOP+                | HET                                              | N. Sandal and J. Stougaard, pers.<br>communication; this work             |
| <i>ccamk-8</i>  | SL0820 <sup>f</sup> -2,3,4     |                  | G3920 to A                                            | W336 to stop | (*),(-),-*                           | n.d.,(-),n.d.             | all in<br>NODPOP       | all HOM                                          | this work                                                                 |
| <i>ccamk-9</i>  | SL6438-2,3,4                   |                  | C3282 to T                                            | intron 2     | n.d.,-*,n.d.                         | n.d.,n.d.,n.d.            | all in<br>NODPOP       | all HET                                          | this work                                                                 |
| <i>ccamk-10</i> | SL0240-2                       |                  | G3786 to A                                            | intron 3     | +/-                                  | n.d.                      | NODPOP                 | HOM                                              | this work                                                                 |
| <i>ccamk-11</i> | SL5820-2                       |                  | C4319 to T                                            | intron 4     | +                                    | n.d.                      | NODPOP                 | HET                                              | this work                                                                 |
| <i>ccamk-12</i> | SL5536-2                       |                  | C4756 to T                                            | intron 5     | +/-*                                 | n.d.                      | NODPOP                 | HET                                              | this work                                                                 |
| <i>ccamk-13</i> | cac57.9                        |                  | 7 bp insertion<br>after G462                          | frame shift  | -                                    | n.d.                      |                        |                                                  | L.H. Madsen and J. Stougaard,<br>pers. communication                      |
| <i>snf1-1</i>   | SL0467                         |                  | C3314 to T                                            | T265 to I    | snf <sup>g</sup>                     | n.d.                      |                        |                                                  | Tirichine et al., 2006a; 2000b                                            |

<sup>a</sup> The *CCaMK* genomic sequence is deposited to GenBank under accession number AM230792 and is used as *Lotus japonicus* Gifu reference. Adenine of the ATG initiator codon is designated as position 1.

<sup>b</sup> Phenotypes that are scored only in the initial M<sub>2</sub> generation are denoted by \*; no star stands for additional screening in the M<sub>3</sub> generation. In the nodulation phenotype "+/-" designates reduced nodule number, smaller size or white colour. Annotations in brackets indicate lines harbouring more than one mutation in nodulation genes.

<sup>c</sup> Genotype of progenitor or mutant plant in the M<sub>2</sub> generation is given as HOM = homozygous or HET = heterozygous with respect to the mutant allele.

<sup>d</sup> Lines contain in addition a *har1-1* mutation.

<sup>e</sup> Line 282-643M1M1M3 carries the mutant alleles *castor-28*, *ccamk-7*, and *nup85-9*.

<sup>f</sup> Lines SL0820-2,3 carry the mutant alleles *castor-13* and *ccamk-8*.

<sup>g</sup> Spontaneous nodule formation.

**CYCLOPS**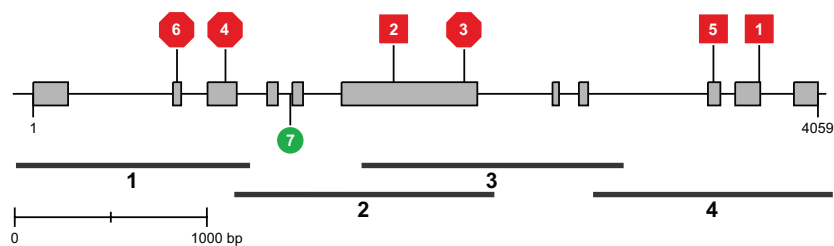

| Allele           | Progenitor/<br>mutant line | Previous<br>name                | Genomic<br>mutation <sup>a</sup>   | Effect                   | Nodulation<br>phenotype <sup>b</sup> | AM phenotype <sup>b</sup> | Detected by<br>TILLING | Genotype of<br>M <sub>2</sub> plant <sup>c</sup> | Reference                                                                                 |
|------------------|----------------------------|---------------------------------|------------------------------------|--------------------------|--------------------------------------|---------------------------|------------------------|--------------------------------------------------|-------------------------------------------------------------------------------------------|
| <i>cyclops-1</i> | 10512.9                    | <i>sym6-1</i>                   | insertion at the<br>end of exon 10 | frame shift              | -                                    | -                         |                        |                                                  | Schauser et al., 1998; Kistner et al., 2005; Yano et al., 2008                            |
| <i>cyclops-2</i> | 1962-124;<br>pASac124      | <i>sym6-2</i>                   | A <sub>1866</sub> del.             | frame shift              | -;n.d.                               | -;n.d.                    | pASac124 in<br>NODPOP+ | HOM                                              | Schauser et al., 1998; Yano et al., 2008; Sandal et al., 2006; this work                  |
| <i>cyclops-3</i> | EMS126                     | <i>sym30</i> ,<br><i>sym6-3</i> | G <sub>2241</sub> to A             | W <sub>371</sub> to stop | -                                    | -                         | NODPOP+                | HOM                                              | Schauser et al., 1998; Szczygłowski et al., 1998; Kistner et al., 2005; Yano et al., 2008 |
| <i>cyclops-4</i> | N-4                        | <i>sym82</i>                    | C <sub>996</sub> to T              | Q <sub>107</sub> to stop | -                                    | -                         |                        |                                                  | Yano et al., 2006; 2008                                                                   |
| <i>cyclops-5</i> | SL1347-2                   |                                 | G <sub>3508</sub> del.             | frame shift              | +/-                                  | n.d.                      | NODPOP                 | HOM                                              | Yano et al., 2008; this work                                                              |
| <i>cyclops-6</i> | SL0488-3                   |                                 | C <sub>752</sub> to T              | R <sub>74</sub> to stop  | *                                    | n.d.                      | NODPOP                 | HOM                                              | this work                                                                                 |
| <i>cyclops-7</i> | SL0295-2                   |                                 | C <sub>1328</sub> to T             | intron 4                 | +/-                                  | +                         | NODPOP                 | HET                                              | this work                                                                                 |

<sup>a</sup> The *CYCLOPS* genomic sequence is deposited to GenBank under accession number AP009158 and is used as *Lotus japonicus* MG20 reference. Adenine of the ATG initiator codon is designated as position 1.

<sup>b</sup> Phenotypes that are scored only in the initial M<sub>2</sub> generation are denoted by \*; no star stands for additional screening in the M<sub>3</sub> generation. In the nodulation phenotype "+/-" designates reduced nodule number, smaller size or white colour.

<sup>c</sup> Genotype of progenitor or mutant plant in the M<sub>2</sub> generation is given as HOM = homozygous or HET = heterozygous with respect to the mutant allele.

**NFR1**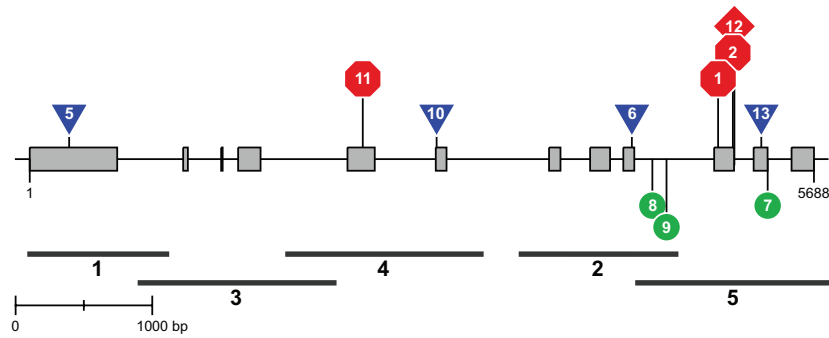

| Allele         | Progenitor/<br>mutant line | Previous<br>name | Genomic<br>mutation <sup>a</sup> | Effect                                  | Nodulation<br>phenotype <sup>b</sup> | AM phenotype <sup>b</sup> | Detected by<br>TILLING | Genotype of<br>M <sub>2</sub> plant <sup>c</sup> | Reference                                                         |
|----------------|----------------------------|------------------|----------------------------------|-----------------------------------------|--------------------------------------|---------------------------|------------------------|--------------------------------------------------|-------------------------------------------------------------------|
| <i>nfr1-1</i>  | 282-118                    | <i>sym1-1</i>    | C <sub>4973</sub> to T           | Q <sub>493</sub> to stop                | -                                    | +                         |                        |                                                  | Schauser et al., 1998; Radutoiu et al., 2003; Sandal et al., 2006 |
| <i>nfr1-2</i>  | 282-665                    | <i>sym1-2</i>    | G <sub>5081</sub> to T           | E <sub>529</sub> to stop                | -                                    | +                         |                        |                                                  | Schauser et al., 1998; Radutoiu et al., 2003; Sandal et al., 2006 |
| <i>nfr1-3</i>  | N38                        |                  | n.d.                             | n.d.                                    | n.d.                                 | n.d.                      |                        |                                                  | Sandal et al., 2006                                               |
| <i>nfr1-4</i>  | G71-23                     |                  | n.d.                             | n.d.                                    | n.d.                                 | n.d.                      |                        |                                                  | Sandal et al., 2006                                               |
| <i>nfr1-5</i>  | SL0456-2 <sup>d</sup>      |                  | G <sub>284</sub> to A            | G <sub>96</sub> to D                    | (+)                                  | n.d.                      | NODPOP                 | HET                                              | this work                                                         |
| <i>nfr1-6</i>  | SL5426-3 <sup>e</sup>      |                  | G <sub>4377</sub> to A           | G <sub>485</sub> to E                   | (-)                                  | (+)                       | NODPOP                 | HOM                                              | this work                                                         |
| <i>nfr1-7</i>  | SL0355-3 <sup>f</sup>      |                  | G <sub>5331</sub> to A           | K <sub>569</sub> to K<br>(splice site?) | (-)                                  | (+)                       | NODPOP                 | HOM                                              | this work                                                         |
| <i>nfr1-8</i>  | SL1000-2                   |                  | G <sub>4623</sub> to A           | intron 9                                | -*                                   | n.d.                      | NODPOP                 | HOM                                              | this work                                                         |
| <i>nfr1-9</i>  | SL6832-2                   |                  | G <sub>4619</sub> to A           | intron 9                                | +/-*                                 | n.d.                      | NODPOP                 | HET                                              | this work                                                         |
| <i>nfr1-10</i> | SL1174-2                   |                  | G <sub>2941</sub> to A           | A <sub>350</sub> to T                   | -                                    | +                         | NODPOP                 | HOM                                              | this work                                                         |
| <i>nfr1-11</i> | SL1977-4                   |                  | C <sub>2412</sub> to T           | Q <sub>316</sub> to stop                | -                                    | n.d.                      | NODPOP                 | HOM                                              | this work                                                         |
| <i>nfr1-12</i> | SL6793-2                   |                  | G <sub>5105</sub> to A           | splice site                             | -                                    | n.d.                      |                        | HOM                                              | this work                                                         |
| <i>nfr1-13</i> | SL1503-3,4,5,6             |                  | G <sub>5287</sub> to A           | D <sub>555</sub> to N                   | -*, -, -, -                          | n.d., -, +, -             | all in<br>NODPOP       | all HET                                          | this work                                                         |

<sup>a</sup> The *NFR1* genomic sequence is deposited to GenBank under accession number AJ575247 (*NFR1b*) and is used as *Lotus japonicus* Gifu reference. Adenine of the ATG initiator codon is designated as position 1.

<sup>b</sup> Phenotypes that are scored only in the initial M<sub>2</sub> generation are denoted by \*; no star stands for additional screening in the M<sub>3</sub> generation. In the nodulation phenotype "+/-" designates reduced nodule number, smaller size or white colour. Annotations in brackets indicate lines harbouring more than one mutation in nodulation genes.

<sup>c</sup> Genotype of progenitor or mutant plant in the M<sub>2</sub> generation is given as HOM = homozygous or HET = heterozygous with respect to the mutant allele.

<sup>d</sup> Line SL0456-2 carries the mutant alleles *nfr1-5* and *pollux-28*.

<sup>e</sup> Line SL5426 carries the mutant alleles *nfr1-6*, *nfr5-6* and *nin-9*.

<sup>f</sup> Line SL0355-3 carries the mutant alleles *nfr1-7* and *nup133-18*.



**NFR5**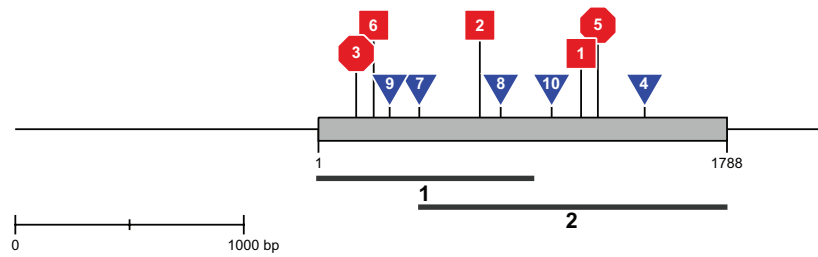

| Allele         | Progenitor/<br>mutant line                  | Previous<br>name | Genomic<br>mutation <sup>a</sup>                 | Effect                                      | Nodulation<br>phenotype <sup>b</sup> | AM phenotype <sup>b</sup> | Detected by<br>TILLING | Genotype of<br>M <sub>2</sub> plant <sup>c</sup> | Reference                                           |
|----------------|---------------------------------------------|------------------|--------------------------------------------------|---------------------------------------------|--------------------------------------|---------------------------|------------------------|--------------------------------------------------|-----------------------------------------------------|
| <i>nfr5-1</i>  | 282-894                                     |                  | G <sub>1138</sub> -T <sub>1164</sub><br>deletion | E <sub>380</sub> -A <sub>388</sub> deletion | -                                    | +                         |                        |                                                  | Madsen et al., 2003; Sandal et al., 2006            |
| <i>nfr5-2</i>  | KL865                                       | <i>sym5</i>      | transposon<br>insertion at C <sub>700</sub>      | frame shift                                 | -                                    | +                         |                        |                                                  | Madsen et al., 2003; Sandal et al., 2006            |
| <i>nfr5-3</i>  | EMS223;<br>SL3257-2                         | <i>sym25</i>     | C <sub>163</sub> to T                            | Q <sub>55</sub> to stop                     | -;-                                  | +;+                       | SL3257-2 in<br>NODPOP  | SL3257-2 is<br>HOM                               | Madsen et al., 2003; Sandal et al., 2006; this work |
| <i>nfr5-4</i>  | S4-1 <sup>d</sup>                           |                  | G <sub>1415</sub> to A                           | G <sub>472</sub> to E                       | (-)                                  | (+)                       |                        |                                                  | Madsen et al., 2003; Murray et al., 2006            |
| <i>nfr5-5</i>  | S58-1 <sup>d</sup>                          |                  | G <sub>1212</sub> to A                           | W <sub>404</sub> to stop                    | (-)                                  | (+)                       |                        |                                                  | Madsen et al., 2003; Murray et al., 2006            |
| <i>nfr5-6</i>  | B31-E <sup>d</sup> ;<br>SL5426 <sup>e</sup> |                  | C <sub>237</sub> del.                            | frame shift                                 | (-);(-)                              | (+);n.d.                  | NODPOP+;<br>NODPOP     | HOM; HOM                                         | Madsen et al., 2003; Murray et al., 2006; this work |
| <i>nfr5-7</i>  | SL1093-2                                    |                  | G <sub>436</sub> to A                            | V <sub>146</sub> to I                       | +*                                   | n.d.                      | NODPOP                 | HOM                                              | this work                                           |
| <i>nfr5-8</i>  | SL1719-2 <sup>f</sup> ,4,5                  |                  | G <sub>790</sub> to A                            | G <sub>264</sub> to R                       | (+/-), +/-, +/-                      | (+), +, n.d.              | all in<br>NODPOP       | HOM, HET,<br>HET                                 | this work                                           |
| <i>nfr5-9</i>  | SL5390-2                                    |                  | G <sub>302</sub> to A                            | C <sub>101</sub> to Y                       | -                                    | +                         |                        |                                                  | this work                                           |
| <i>nfr5-10</i> | SL1999-4                                    |                  | G <sub>1009</sub> to A                           | A <sub>337</sub> to T                       | n.d.                                 | n.d.                      | NODPOP                 | HET                                              | this work                                           |

<sup>a</sup> The *NFR5* genomic sequence is deposited to GenBank under accession number AJ575254 and is used as *Lotus japonicus* Gifu reference. Adenine of the ATG initiator codon is designated as position 1.

<sup>b</sup> Phenotypes that are scored only in the initial M<sub>2</sub> generation are denoted by \*; no star stands for additional screening in the M<sub>3</sub> generation. In the nodulation phenotype "+/-" designates reduced nodule number, smaller size or white colour. Annotations in brackets indicate lines harbouring more than one mutation in nodulation genes.

<sup>c</sup> Genotype of progenitor or mutant plant in the M<sub>2</sub> generation is given as HOM = homozygous or HET = heterozygous with respect to the mutant allele.

<sup>d</sup> Lines contain in addition a *har1-1* mutation.

<sup>e</sup> Line SL5426 carries the mutant alleles *nfr1-6*, *nfr5-6* and *nin-9*.

<sup>f</sup> Line SL1719-2 carries the mutant alleles *nfr5-8* and *nsp1-5*.

**NIN**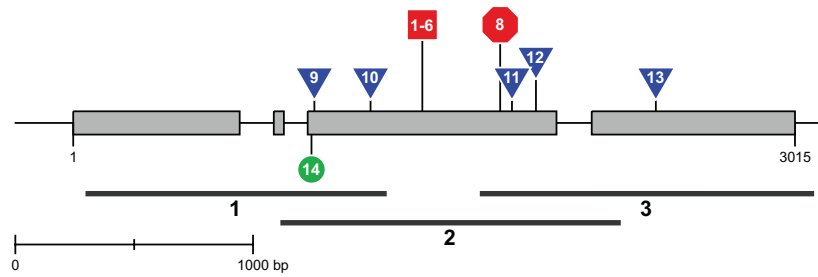

| Allele        | Progenitor/<br>mutant line                   | Previous<br>name | Genomic<br>mutation <sup>a</sup>             | Effect                                                     | Nodulation<br>phenotype <sup>b</sup> | AM phenotype <sup>b</sup> | Detected by<br>TILLING | Genotype of<br>M <sub>2</sub> plant <sup>c</sup> | Reference                                  |
|---------------|----------------------------------------------|------------------|----------------------------------------------|------------------------------------------------------------|--------------------------------------|---------------------------|------------------------|--------------------------------------------------|--------------------------------------------|
| <i>nin-1</i>  | 96.1M2                                       |                  | transposon<br>insertion at C <sub>1459</sub> | frame shift                                                | -                                    | +                         |                        |                                                  | Schauser et al., 1999; Sandal et al., 2006 |
| <i>nin-2</i>  | 96.1M2<br>offspring 1                        |                  | transposon<br>footprint at C <sub>1459</sub> | frame shift                                                | -                                    | +                         |                        |                                                  | Schauser et al., 1999                      |
| <i>nin-3</i>  | 96.1M2<br>offspring 2                        |                  | transposon<br>footprint at C <sub>1459</sub> | frame shift                                                | -                                    | +                         |                        |                                                  | Schauser et al., 1999                      |
| <i>nin-4</i>  | 96.1M2<br>offspring 3                        |                  | transposon<br>footprint at C <sub>1459</sub> | amino acid<br>insertion V <sub>410</sub> -N <sub>411</sub> | +                                    | +                         |                        |                                                  | Schauser et al., 1999                      |
| <i>nin-5</i>  | 96.1M2<br>offspring 4                        |                  | transposon<br>footprint at C <sub>1459</sub> | amino acid<br>insertion N <sub>410</sub>                   | +                                    | +                         |                        |                                                  | Schauser et al., 1999                      |
| <i>nin-6</i>  | KL773                                        |                  | transposon<br>footprint at C <sub>1459</sub> | amino acid<br>insertion V <sub>410</sub> -N <sub>411</sub> | +                                    | n.d.                      |                        |                                                  | N. Sandal, pers. communication             |
| <i>nin-7</i>  | KL577                                        |                  | n.d.                                         | n.d.                                                       | -                                    | +                         |                        |                                                  | Sandal et al., 2006                        |
| <i>nin-8</i>  | B21-1 <sup>e</sup> ;<br>B47-B                |                  | C <sub>1785</sub> to T                       | Q <sub>219</sub> to stop                                   | (-);n.d.                             | (-);n.d.                  | both in<br>NODPOP+     | both HOM                                         | Murray et al., 2006; this work             |
| <i>nin-9</i>  | SL5369 <sup>e</sup> ;<br>SL5426 <sup>f</sup> |                  | G <sub>1002</sub> to A                       | V <sub>258</sub> to M                                      | (+);(-)                              | n.d.;n.d.                 | both in<br>NODPOP      | HOM, HOM                                         | this work                                  |
| <i>nin-10</i> | S46-1 <sup>g</sup>                           |                  | G <sub>1242</sub> to A                       | A <sub>338</sub> to T                                      | (-)                                  | (-)                       | NODPOP+                | HOM                                              | Murray et al., 2006; this work             |
| <i>nin-11</i> | SL0605-2,3 <sup>h</sup>                      |                  | G <sub>1848</sub> to A                       | E <sub>540</sub> to K                                      | (-),(-*)                             | (-),n.d.                  | NODPOP                 | HOM                                              | this work                                  |
| <i>nin-12</i> | SL1798-2,4,5                                 |                  | G <sub>1927</sub> to A                       | R <sub>366</sub> to K                                      | +,+,+*                               | n.d.,n.d.,n.d.            | all in<br>NODPOP       | HET, HOM,<br>HET                                 | this work                                  |
| <i>nin-13</i> | SL3012-1                                     |                  | G <sub>2431</sub> to A                       | G <sub>685</sub> to R                                      | n.d.                                 | n.d.                      | GENPOP                 | HOM                                              | this work                                  |
| <i>nin-14</i> | SL5800-3                                     |                  | G <sub>986</sub> to A                        | E <sub>252</sub> to E                                      | -*                                   | n.d.                      | NODPOP                 | HET                                              | this work                                  |

<sup>a</sup> The *NIN* genomic sequence is deposited to GenBank under accession number AJ238956 and is used as *Lotus japonicus* Gifu reference. Adenine of the ATG initiator codon is designated as position 1.

<sup>b</sup> Phenotypes that are scored only in the initial M<sub>2</sub> generation are denoted by \*; no star stands for additional screening in the M<sub>3</sub> generation. In the nodulation phenotype "+/-" designates reduced nodule number, smaller size or white colour.

<sup>c</sup> Genotype of progenitor or mutant plant in the M<sub>2</sub> generation is given as HOM = homozygous or HET = heterozygous with respect to the mutant allele.

<sup>d</sup> Line contains in addition a *har1-1* mutation.

<sup>e</sup> Line SL5369 carries the mutant alleles *nin-9* and *nsp2-9*.

<sup>f</sup> Line SL5426 carries the mutant alleles *nfr1-6*, *nfr5-6* and *nin-9*.

<sup>g</sup> Line S46-1 carries the mutant alleles *castor-25*, *nin-10*, and *har1-1*.

<sup>h</sup> Lines SL0605-2,3 carry the mutant alleles *nin-11* and *symrk-9*

**NSP1**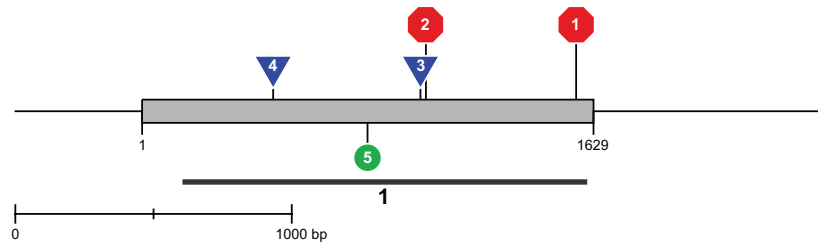

| Allele        | Progenitor/<br>mutant line | Previous<br>name | Genomic<br>mutation <sup>a</sup> | Effect                   | Nodulation<br>phenotype <sup>b</sup> | AM phenotype <sup>b</sup> | Detected by<br>TILLING | Genotype of<br>M <sub>2</sub> plant <sup>c</sup> | Reference                                          |
|---------------|----------------------------|------------------|----------------------------------|--------------------------|--------------------------------------|---------------------------|------------------------|--------------------------------------------------|----------------------------------------------------|
| <i>nsp1-1</i> | SL1795-4                   |                  | G <sub>1560</sub> to A           | W <sub>520</sub> to stop | -                                    | +                         |                        |                                                  | Heckmann et al., 2006                              |
| <i>nsp1-2</i> | S70-1                      |                  | C <sub>1024</sub> to T           | Q <sub>342</sub> to stop | n.d.                                 | n.d.                      | NODPOP+                | HOM                                              | K. Szczyglowski, pers.<br>communication; this work |
| <i>nsp1-3</i> | SL0074-3                   |                  | C <sub>1007</sub> to T           | S <sub>336</sub> to F    | +*                                   | n.d.                      | NODPOP                 | HOM                                              | this work                                          |
| <i>nsp1-4</i> | SL0241-2                   |                  | A <sub>476</sub> to G            | N <sub>159</sub> to S    | +*                                   | n.d.                      | NODPOP                 | HET                                              | this work                                          |
| <i>nsp1-5</i> | SL1719-2 <sup>d</sup>      |                  | G <sub>798</sub> to A            | S <sub>266</sub> to S    | (+/-)                                | (+)                       | NODPOP                 | HOM                                              | this work                                          |

<sup>a</sup> The *NSP1* genomic sequence is deposited to GenBank under accession number EF012819 and is used as *Lotus japonicus* Gifu reference. Adenine of the ATG initiator codon is designated as position 1.

<sup>b</sup> Phenotypes that are scored only in the initial M<sub>2</sub> generation are denoted by \*; no star stands for additional screening in the M<sub>3</sub> generation. In the nodulation phenotype "+/-" designates reduced nodule number, smaller size or white colour. Annotations in brackets indicate lines harbouring more than one mutation in nodulation genes.

<sup>c</sup> Genotype of progenitor or mutant plant in the M<sub>2</sub> generation is given as HOM = homozygous or HET = heterozygous with respect to the mutant allele.

<sup>d</sup> Line SL1719-2 carries the mutant alleles *nfr5-8* and *nsp1-5*.

**NSP2**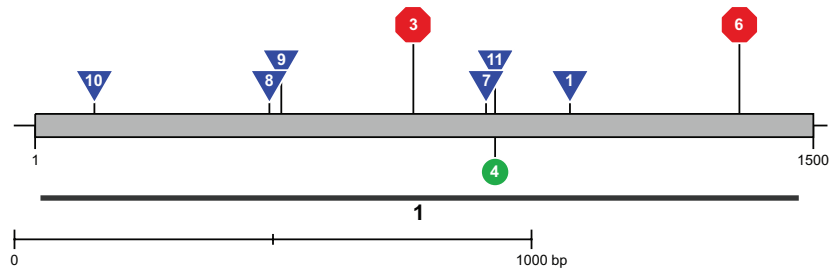

| Allele         | Progenitor/<br>mutant line | Previous<br>name               | Genomic<br>mutation <sup>a</sup> | Effect                   | Nodulation<br>phenotype <sup>b</sup> | AM phenotype <sup>b</sup> | Detected by<br>TILLING | Genotype of<br>M <sub>2</sub> plant <sup>c</sup> | Reference                                                            |
|----------------|----------------------------|--------------------------------|----------------------------------|--------------------------|--------------------------------------|---------------------------|------------------------|--------------------------------------------------|----------------------------------------------------------------------|
| <i>nsp2-1</i>  | cac18.4                    |                                | T <sub>1075</sub> to A           | V <sub>359</sub> to E    | -                                    | +                         |                        |                                                  | Kawaguchi et al., 2002; Heckmann et al., 2006; Murakami et al., 2007 |
| <i>nsp2-2</i>  | [ <i>sym35/sym70</i> ]     | <i>sym35</i> ,<br><i>sym70</i> | large deletion                   | <i>NSP2</i> del.         | -                                    | +                         |                        |                                                  | Kawaguchi et al., 2002; Heckmann et al., 2006; Murakami et al., 2007 |
| <i>nsp2-3</i>  | SL0781-3                   |                                | C <sub>730</sub> to T            | Q <sub>244</sub> to stop | -                                    | +                         | NODPOP                 | HOM                                              | Heckmann et al., 2006                                                |
| <i>nsp2-4</i>  | SL2663-3                   |                                | C <sub>888</sub> to T            | P <sub>296</sub> to P    | -*                                   | n.d.                      | NODPOP                 | HET                                              | this work                                                            |
| <i>nsp2-5</i>  | B32-A <sup>d</sup>         |                                | n.d.                             | n.d.                     | (-)                                  | (+)                       |                        |                                                  | Murray et al., 2006                                                  |
| <i>nsp2-6</i>  | B85-E <sup>d</sup>         |                                | C <sub>1357</sub> to T           | Q <sub>453</sub> to stop | (-)                                  | (+)                       |                        |                                                  | Murray et al., 2006                                                  |
| <i>nsp2-7</i>  | B90-A <sup>d</sup>         |                                | C <sub>869</sub> to T            | A <sub>290</sub> to V    | (-)                                  | (+)                       |                        |                                                  | Murray et al., 2006                                                  |
| <i>nsp2-8</i>  | SL1898-4                   |                                | G <sub>455</sub> to A            | G <sub>152</sub> to D    | ++                                   | n.d.                      | NODPOP                 | HET                                              | this work                                                            |
| <i>nsp2-9</i>  | SL5369 <sup>e</sup>        |                                | C <sub>479</sub> to T            | A <sub>160</sub> to V    | (+)                                  | n.d.                      | NODPOP                 | HOM                                              | this work                                                            |
| <i>nsp2-10</i> | SL1055-1                   |                                | C <sub>113</sub> to T            | S <sub>38</sub> to F     | n.d.                                 | n.d.                      | GENPOP                 | HET                                              | this work                                                            |
| <i>nsp2-11</i> | S58-1                      |                                | C <sub>886</sub> to T            | P <sub>296</sub> to S    | n.d.                                 | n.d.                      | NODPOP+                | HOM                                              | K. Szczyglowski, pers. communication; this work                      |

<sup>a</sup> The *NSP2* genomic sequence is deposited to GenBank under accession number DQ665943 and is used as *Lotus japonicus* Gifu reference. Adenine of the ATG initiator codon is designated as position 1.

<sup>b</sup> Phenotypes that are scored only in the initial M<sub>2</sub> generation are denoted by \*; no star denotes additional screening in the M<sub>3</sub> generation. Annotations in brackets indicate lines harbouring more than one mutation in nodulation genes.

<sup>c</sup> Genotype of progenitor or mutant plant in the M<sub>2</sub> generation is given as HOM = homozygous or HET = heterozygous with respect to the mutant allele.

<sup>d</sup> Lines contain in addition a *har1-1* mutation.

<sup>e</sup> Line SL5369 carries the mutant alleles *nin-9* and *nsp2-9*.

**NUP85**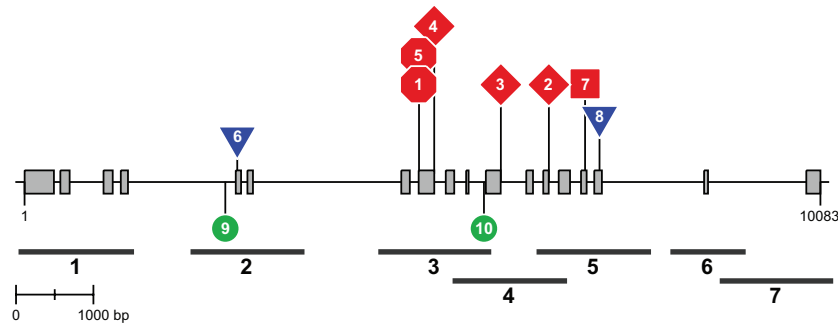

| Allele                     | Progenitor/<br>mutant line | Previous<br>name | Genomic<br>mutation <sup>a</sup> | Effect                                 | Nodulation<br>phenotype <sup>b</sup> | AM phenotype <sup>b</sup> | Detected by<br>TILLING | Genotype of<br>M <sub>2</sub> plant <sup>c</sup> | Reference                                                     |
|----------------------------|----------------------------|------------------|----------------------------------|----------------------------------------|--------------------------------------|---------------------------|------------------------|--------------------------------------------------|---------------------------------------------------------------|
| <i>nup85-1<sup>d</sup></i> | EMS76                      | <i>sym24</i>     | G <sub>4992</sub> to A           | W <sub>306</sub> to stop               | -                                    | -                         |                        |                                                  | Saito et al., 2007                                            |
| <i>nup85-2</i>             | 1-1E                       | <i>sym73</i>     | G <sub>6623</sub> to A           | splice site,<br>deletion of exon<br>13 | -                                    | +/-                       |                        |                                                  | Saito et al., 2007                                            |
| <i>nup85-3</i>             | 1-6F                       | <i>sym85</i>     | G <sub>6020</sub> to A           | splice site,<br>leads to stop          | -                                    | -                         |                        |                                                  | Saito et al., 2007                                            |
| <i>nup85-4</i>             | B46-D <sup>e</sup>         |                  | G <sub>5188</sub> to A           | splice site                            | (-)                                  | (-)                       |                        |                                                  | Murray et al., 2006; Saito et al.,<br>2007                    |
| <i>nup85-5<sup>d</sup></i> | EMS76                      |                  | G <sub>4992</sub> to A           | W <sub>306</sub> to stop               | -                                    | -                         | NODPOP+                | HOM                                              | Kistner et al., 2005; this work                               |
| <i>nup85-6</i>             | SL0948-9                   |                  | C <sub>2701</sub> to T           | S <sub>235</sub> to F                  | +/-*                                 | n.d.                      | NODPOP                 | HOM                                              | this work                                                     |
| <i>nup85-7</i>             | Pgus7M1M1                  |                  | A <sub>7108</sub> del.           | frame shift                            | +/-                                  | n.d.                      | NODPOP+                | HOM                                              | N. Sandal and J. Stougaard, pers.<br>communication; this work |
| <i>nup85-8</i>             | SL0206-3                   |                  | C <sub>7282</sub> to T           | S <sub>625</sub> to F                  | +                                    | n.d.                      | NODPOP                 | HET                                              | this work                                                     |
| <i>nup85-9</i>             | 282-643M1M1M3 <sup>f</sup> |                  | T <sub>2545</sub> to C           | intron 4                               | (-)                                  | n.d.                      | NODPOP+                | HET                                              | N. Sandal and J. Stougaard, pers.<br>communication; this work |
| <i>nup85-10</i>            | SL0005-2                   |                  | C <sub>5848</sub> to T           | intron 10                              | +*                                   | n.d.                      | NODPOP                 | HOM                                              | this work                                                     |

<sup>a</sup> The *NUP85* genomic sequence is deposited to GenBank under accession number AP009253 and is used as *Lotus japonicus* MG20 reference. Adenine of the ATG initiator codon is designated as position 1.

<sup>b</sup> Phenotypes that are scored only in the initial M<sub>2</sub> generation are denoted by \*; no star stands for additional screening in the M<sub>3</sub> generation. In the nodulation phenotype "+/-" designates reduced nodule number, smaller size or white colour, in the AM phenotype it designates delayed colonization. Annotations in brackets indicate lines harbouring more than one mutation in nodulation genes.

<sup>c</sup> Genotype of progenitor or mutant plant in the M<sub>2</sub> generation is given as HOM = homozygous or HET = heterozygous with respect to the mutant allele.

<sup>d</sup> *nup85-1* and *nup85-5* are the same allele in the same line.

<sup>e</sup> Lines contain in addition a *har1-1* mutation.

<sup>f</sup> Line 282-643 carries the mutant alleles *castor-28*, *ccamk-7*, and *nup85-9*.

**NUP133**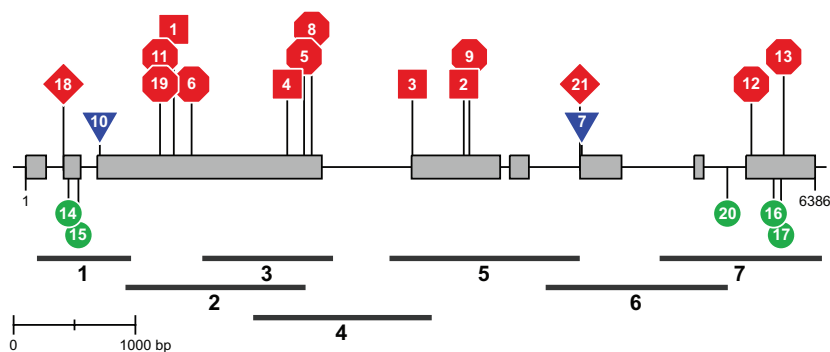

| Allele                       | Progenitor/<br>mutant line          | Previous<br>name         | Genomic<br>mutation <sup>a</sup>                 | Effect                    | Nodulation<br>phenotype <sup>b</sup> | AM phenotype <sup>b</sup> | Detected by<br>TILLING | Genotype of<br>M <sub>2</sub> plant <sup>c</sup> | Reference                                               |
|------------------------------|-------------------------------------|--------------------------|--------------------------------------------------|---------------------------|--------------------------------------|---------------------------|------------------------|--------------------------------------------------|---------------------------------------------------------|
| <i>nup133-1</i>              | 5371-22                             | <i>sym3-1</i>            | A <sub>1196</sub> -T <sub>1205</sub><br>deletion | frame shift               | -                                    | -                         |                        |                                                  | Schauser et al., 1998; Kanamori et al., 2006            |
| <i>nup133-2</i>              | 2557-1                              | <i>sym3-2</i>            | T <sub>3543</sub> -T <sub>3544</sub><br>deletion | frame shift               | -                                    | -                         |                        |                                                  | Schauser et al., 1998; Kanamori et al., 2006            |
| <i>nup133-3</i>              | cac33.1                             | <i>sym3-3</i>            | transposon<br>insertion at T <sub>3126</sub>     | frame shift               | -                                    | -                         |                        |                                                  | Schauser et al., 1998; Kanamori et al., 2006            |
| <i>nup133-4<sup>d</sup></i>  | EMS247 <sup>d</sup>                 | <i>sym45<sup>d</sup></i> | T <sub>2115</sub> del.                           | frame shift               | -                                    | -                         |                        |                                                  | Schauser et al., 1998; Kanamori et al., 2006            |
| <i>nup133-5</i>              | B46-C <sup>e</sup>                  |                          | G <sub>2253</sub> to A                           | W <sub>656</sub> to stop  | n.d.                                 | n.d.                      |                        |                                                  | Murray et al., 2006                                     |
| <i>nup133-6</i>              | B62-D <sup>e</sup>                  |                          | G <sub>1342</sub> to A                           | W <sub>352</sub> to stop  | (+/-)                                | (-)                       |                        |                                                  | Murray et al., 2006                                     |
| <i>nup133-7</i>              | B80-A <sup>e</sup>                  |                          | G <sub>4496</sub> to A                           | E <sub>1029</sub> to K    | (-)                                  | (-)                       |                        |                                                  | Murray et al., 2006                                     |
| <i>nup133-8</i>              | B88-B <sup>2e</sup>                 |                          | C <sub>2321</sub> to A                           | Q <sub>679</sub> to stop  | (-)                                  | (-)                       |                        |                                                  | Murray et al., 2006                                     |
| <i>nup133-9</i>              | Sup12 <sup>e</sup>                  |                          | G <sub>3587</sub> to A                           | W <sub>658</sub> to stop  | (+/-)                                | (-)                       |                        |                                                  | Murray et al., 2006                                     |
| <i>nup133-10</i>             | SL0886                              |                          | G <sub>600</sub> to A                            | G <sub>105</sub> to D     | +                                    | n.d.                      | NODPOP                 | HET                                              | this work                                               |
| <i>nup133-11</i>             | SL5179-12                           |                          | C <sub>1097</sub> to T                           | Q <sub>271</sub> to stop  | -                                    | n.d.                      | NODPOP                 | HOM                                              | this work                                               |
| <i>nup133-12</i>             | SL0443-3                            |                          | C <sub>5874</sub> to T                           | Q <sub>1140</sub> to stop | -                                    | -                         | NODPOP                 | HOM                                              | this work                                               |
| <i>nup133-13</i>             | B30-A                               |                          | T <sub>6158</sub> to G                           | Y <sub>1234</sub> to stop | -                                    | -                         | NODPOP+                | HET                                              | K. Szczygłowski, pers. communication; this work         |
| <i>nup133-14</i>             | SL0317-3 <sup>f</sup>               |                          | G <sub>340</sub> to A                            | E <sub>67</sub> to E      | (++)                                 | n.d.                      | NODPOP                 | HET                                              | this work                                               |
| <i>nup133-15</i>             | SL0615-2                            |                          | G <sub>418</sub> to A                            | L <sub>93</sub> to L      | -                                    | n.d.                      | NODPOP                 | HOM                                              | this work                                               |
| <i>nup133-16</i>             | SL5390-2                            |                          | G <sub>6062</sub> to A                           | K <sub>1202</sub> to K    | -                                    | +                         | NODPOP                 | HET                                              | this work                                               |
| <i>nup133-17</i>             | SL1409-2                            |                          | C <sub>6108</sub> to T                           | L <sub>1218</sub> to L    | +                                    | n.d.                      | NODPOP                 | HET                                              | this work                                               |
| <i>nup133-18</i>             | SL0355-3 <sup>g</sup>               |                          | G <sub>309</sub> to A                            | splice site               | (-)                                  | (+)                       |                        |                                                  | this work                                               |
| <i>nup133-19</i>             | SL2032-2;<br>SL4119-2;<br>SL5064-2; |                          | G <sub>1096</sub> to A                           | W <sub>270</sub> to stop  | -; -; -                              | n.d.; n.d.; n.d.          |                        |                                                  | this work                                               |
| <i>nup133-20</i>             | SL0836-2                            |                          | G <sub>5680</sub> to A                           | intron 7                  | -*                                   | n.d.                      | NODPOP                 | HET                                              | this work                                               |
| <i>nup133-21<sup>d</sup></i> | EMS247 <sup>d</sup>                 | <i>sym45<sup>d</sup></i> | G <sub>4496</sub> to A                           | splice site               | n.d.                                 | n.d.                      |                        |                                                  | Schauser et al., 1998; Kanamori et al., 2006; this work |

<sup>a</sup> The *NUP133* genomic sequence is deposited to GenBank under accession number AJ890252 and is used as *Lotus japonicus* Gifu reference. Adenine of the ATG initiator codon is designated as position 1.

<sup>b</sup> Phenotypes that are scored only in the initial M<sub>2</sub> generation are denoted by \*; no star stands for additional screening in the M<sub>3</sub> generation. In the nodulation phenotype "+/-" designates reduced nodule number, smaller size or white colour. Annotations in brackets indicate lines harbouring more than one mutation in nodulation genes.

<sup>c</sup> Genotype of progenitor or mutant plant in the M<sub>2</sub> generation is given as HOM = homozygous or HET = heterozygous with respect to the mutant allele.

<sup>d</sup> Line EMS247 carries two mutations marked as mutant alleles *nup133-4* and *nup133-21*.

<sup>e</sup> Lines contain in addition a *har1-1* mutation.

<sup>f</sup> Line SL0317-3 carries the mutant alleles *nup133-14* and *pollux-18*.

<sup>g</sup> Line SL0355-3 carries the mutant alleles *nfr1-7* and *nup133-18*.

**POLLUX**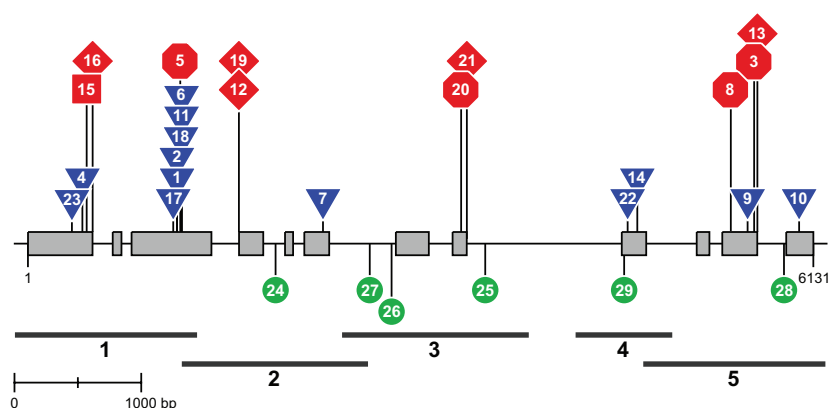

| Allele                       | Progenitor/<br>mutant line | Previous<br>name | Genomic<br>mutation <sup>a</sup> | Effect             | Nodulation<br>phenotype <sup>b</sup> | AM phenotype <sup>b</sup>     | Detected by<br>TILLING | Genotype of<br>M <sub>2</sub> plant <sup>c</sup> | Reference                    |
|------------------------------|----------------------------|------------------|----------------------------------|--------------------|--------------------------------------|-------------------------------|------------------------|--------------------------------------------------|------------------------------|
| <i>pollux-1<sup>d</sup></i>  | EMS70                      | <i>sym23-1</i>   | G1152 to A                       | G303 to S          | -                                    | -                             | NODPOP+                | HOM                                              | Imaizumi-Anraku et al., 2005 |
| <i>pollux-2<sup>d</sup></i>  | EMS167                     | <i>sym23-2</i>   | G1152 to A                       | G303 to S          | -                                    | -                             | NODPOP+                | HOM                                              | Imaizumi-Anraku et al., 2005 |
| <i>pollux-3</i>              | 29-2A                      | <i>sym86-1</i>   | T568 to A                        | L841 to stop       | -                                    | n.d.                          |                        |                                                  | Imaizumi-Anraku et al., 2005 |
| <i>pollux-4</i>              | SL0571-2                   |                  | C434 to T                        | S145 to F          | -                                    | -                             | NODPOP                 | HET                                              | Imaizumi-Anraku et al., 2005 |
| <i>pollux-5</i>              | SL3130-2,4                 |                  | G1204 to A                       | W320 to stop       | -*, -                                | n.d., -                       | both in<br>NODPOP      | both HOM                                         | Imaizumi-Anraku et al., 2005 |
| <i>pollux-6</i>              | SL5691-3,4                 |                  | C1210 to T                       | S322 to F          | +, +*                                | n.d., n.d.                    | both in<br>NODPOP      | both HOM                                         | Imaizumi-Anraku et al., 2005 |
| <i>pollux-7</i>              | SL1899-2,4                 |                  | G2313 to A                       | G530 to E          | +/-, +                               | n.d., n.d.                    | both in<br>NODPOP      | both HOM                                         | Imaizumi-Anraku et al., 2005 |
| <i>pollux-8</i>              | SL0159-2,3,5,6             |                  | G5486 to A                       | W780 to stop       | -*, -*, -*                           | n.d., n.d., -*                | all in<br>NODPOP       | all HOM                                          | Imaizumi-Anraku et al., 2005 |
| <i>pollux-9</i>              | SL0405-2,3,5,6             |                  | G5634 to A                       | E330 to K          | -*, -*, -*                           | n.d., n.d., n.d., n.d.        | all in<br>NODPOP       | all HOM                                          | Imaizumi-Anraku et al., 2005 |
| <i>pollux-10</i>             | SL1070-2                   |                  | G6021 to A                       | G882 to S          | -                                    | n.d.                          | NODPOP                 | HOM                                              | Imaizumi-Anraku et al., 2005 |
| <i>pollux-11</i>             | B12-1A <sup>e</sup>        |                  | G1205 to A                       | W320 to stop       | (-)                                  | (-)                           |                        |                                                  | Murray et al., 2006          |
| <i>pollux-12<sup>f</sup></i> | B50-C <sup>e</sup>         |                  | G1644 to A                       | splice site        | (+/-)                                | (-)                           | NODPOP+                | HOM                                              | Murray et al., 2006          |
| <i>pollux-13</i>             | S49-D <sup>e</sup>         |                  | G5682 to A                       | splice site        | (-)                                  | (-)                           | NODPOP+                | HOM                                              | Murray et al., 2006          |
| <i>pollux-14</i>             | Sup3 <sup>e</sup>          |                  | C4804 to T                       | P719 to L          | (-)                                  | (-)                           | NODPOP+                | HOM                                              | Murray et al., 2006          |
| <i>pollux-15</i>             | S24-1B <sup>g</sup>        |                  | A458-C463 deletion               | Q153-H154 deletion | n.d.                                 | (+)                           | NODPOP+                | HOM                                              | Murray et al., 2006          |
| <i>pollux-16</i>             | SL5998-2,3,4,5,6           |                  | G496 to A                        | splice site        | -*, -*, -*, -*                       | n.d., -*, n.d.,<br>n.d., n.d. | all in<br>NODPOP       | all HOM                                          | this work                    |
| <i>pollux-17</i>             | SL1657-2                   |                  | G1147 to A                       | G301 to E          | -                                    | -                             | NODPOP                 | HOM                                              | this work                    |
| <i>pollux-18</i>             | SL0317-3 <sup>h</sup>      |                  | G1179 to A                       | G312 to S          | (+*)                                 | n.d.                          | NODPOP                 | HET                                              | this work                    |
| <i>pollux-19<sup>i</sup></i> | SL5821-3,5                 |                  | G1644 to A                       | splice site        | -*, *                                | n.d., -                       | both in<br>NODPOP      | both HOM                                         | this work                    |
| <i>pollux-20</i>             | SL0729-6,10                |                  | G3388 to A                       | W651 to stop       | -*, *                                | -*, -                         | both in<br>NODPOP      | both HOM                                         | this work                    |
| <i>pollux-21</i>             | SL1075-2                   |                  | G3416 to A                       | splice site        | -                                    | -                             | NODPOP                 | HOM                                              | this work                    |
| <i>pollux-22</i>             | SL0283-4                   |                  | G4698 to A                       | E384 to K          | n.d.                                 | n.d.                          | NODPOP                 | HET                                              | this work                    |
| <i>pollux-23</i>             | SL4162-2                   |                  | C347 to T                        | T116 to I          | (-)                                  | (-)                           | NODPOP                 | HOM                                              | this work                    |
| <i>pollux-24</i>             | SL1913-7,8 <sup>k</sup>    |                  | C1922 to T                       | intron 4           | (+/-), (-*)                          | (+), n.d.                     | both in<br>NODPOP      | both HET                                         | this work                    |
| <i>pollux-25</i>             | SL5546-2,3                 |                  | C3568 to T                       | intron 8           | +/-*, +/-*                           | n.d., n.d.                    | both in<br>NODPOP      | both HET                                         | this work                    |

|                  |                       |            |           |      |      |        |     |           |
|------------------|-----------------------|------------|-----------|------|------|--------|-----|-----------|
| <i>pollux-26</i> | SL0405-4              | G2837 to A | intron 6  | -*   | n.d. | NODPOP | HET | this work |
| <i>pollux-27</i> | SL0299-2              | G2872 to A | intron 6  | -*   | n.d. | NODPOP | HOM | this work |
| <i>pollux-28</i> | SL0456-2 <sup>k</sup> | T5897 to G | intron 11 | (+)  | n.d. | NODPOP | HET | this work |
| <i>pollux-29</i> | SL0387-3              | G4646 to A | L666 to L | -*   | n.d. | NODPOP | HOM | this work |
| <i>pollux-30</i> | SL1913-8 <sup>l</sup> | G6023 to A | G882 to G | (-*) | n.d. | NODPOP | HET | this work |

<sup>a</sup> The *POLLUX* genomic sequence is deposited to GenBank under accession number AB162017 and is used as *Lotus japonicus* Gifu reference. Adenine of the ATG initiator codon is designated as position 1.

<sup>b</sup> Phenotypes that are scored only in the initial M<sub>2</sub> generation are denoted by \*; no star stands for additional screening in the M<sub>3</sub> generation. In the nodulation phenotype "+/-" designates reduced nodule number, smaller size or white colour. Annotations in brackets indicate lines harbouring more than one mutation in nodulation genes.

<sup>c</sup> Genotype of progenitor or mutant plant in the M<sub>2</sub> generation is given as HOM = homozygous or HET = heterozygous with respect to the mutant allele.

<sup>d</sup> *pollux-1* and *pollux-2* are the same allele.

<sup>e</sup> Lines contain in addition a *har1-1* mutation.

<sup>f</sup> *pollux-12* and *pollux-19* are the same allele.

<sup>g</sup> Line S24-1B carries the mutant alleles *pollux-15* and *symrk-28*.

<sup>h</sup> Line SL0317-3 carries the mutant alleles *nup133-14* and *pollux-18*.

<sup>i</sup> Line SL1913-7 carries the mutant alleles *pollux-24* and *symrk-59*.

<sup>k</sup> Line SL1913-8 carries the mutant alleles *pollux-24* and *pollux-30*.

<sup>l</sup> Line SL0456-2 carries the mutant alleles *nfr1-5* and *pollux-28*.



**SYMRK**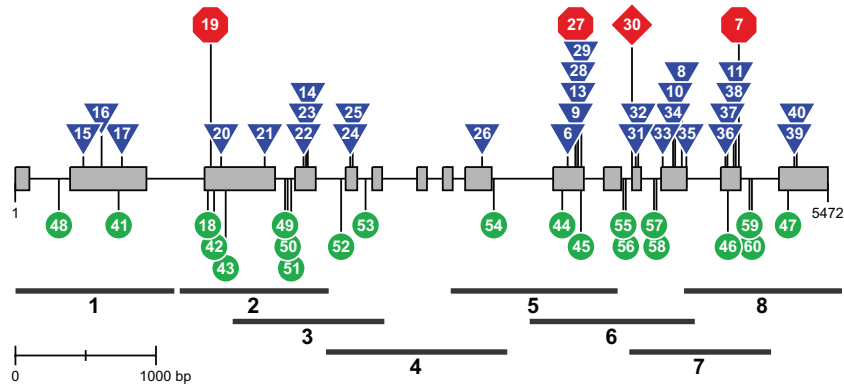

| Allele          | Progenitor/<br>mutant line    | Previous<br>name | Genomic<br>mutation <sup>a</sup> | Effect       | Nodulation<br>phenotype <sup>b</sup>                            | AM phenotype <sup>b</sup>             | Detected by<br>TILLING | Genotype of<br>M <sub>2</sub> plant <sup>c</sup> | Reference                                                             |
|-----------------|-------------------------------|------------------|----------------------------------|--------------|-----------------------------------------------------------------|---------------------------------------|------------------------|--------------------------------------------------|-----------------------------------------------------------------------|
| <i>symrk-1</i>  | 282-287                       | <i>sym2</i>      | ~4.9 kb insertion<br>in exon 3   | frame shift  | -                                                               | -                                     |                        |                                                  | Schauser et al., 1998; Stracke et al., 2002                           |
| <i>symrk-2</i>  | 282-288                       |                  | n.d.                             | n.d.         | -                                                               | -                                     |                        |                                                  | Schauser et al., 1998; Demchenko et al., 2004; Kistner et al., 2005   |
| <i>symrk-3</i>  | cac41.5                       | <i>sym2</i>      | ~5.8 kb insertion<br>in exon 4   | frame shift  | -                                                               | -                                     |                        |                                                  | Stracke et al., 2002; Demchenko et al., 2004; Kistner et al., 2005    |
| <i>symrk-4</i>  | KL481                         |                  | n.d.                             | n.d.         | -                                                               | -                                     |                        |                                                  | Sandal et al., 2006                                                   |
| <i>symrk-5</i>  | cac67.6                       |                  | n.d.                             | n.d.         | -                                                               | -                                     |                        |                                                  | Sandal et al., 2006                                                   |
| <i>symrk-6</i>  | EMS34                         |                  | G3723 to A                       | G603 to R    | -                                                               | n.d.                                  | NODPOP+                | HOM                                              | Szczyglowski et al., 1998; Perry et al., 2003                         |
| <i>symrk-7</i>  | EMS61                         |                  | G4872 to A                       | G806 to stop | -                                                               | -                                     |                        |                                                  | Szczyglowski et al., 1998; Stracke et al., 2002; Kistner et al., 2005 |
| <i>symrk-8</i>  | SL0160-2,3,4,5,6;<br>SL0180-1 |                  | G4510 to A                       | G759 to R    | -; - <sup>+</sup> ; -; - <sup>+</sup> ; + <sup>+</sup>          | -; n.d.; -; -; n.d.; n.d.             | NODPOP;<br>GENPOP      | all HOM; HET                                     | Perry et al., 2003; this work                                         |
| <i>symrk-9</i>  | SL0605 <sup>a</sup> -2,3      |                  | G3729 to A                       | G604 to R    | (-), (- <sup>+</sup> )                                          | (-), n.d.                             | both in<br>NODPOP      | both HOM                                         | Perry et al., 2003                                                    |
| <i>symrk-10</i> | SL1951-<br>1,2,3,4,5,6,7      |                  | G4447 to A                       | D738 to N    | n.d., - <sup>+</sup> ; -; - <sup>+</sup> ; -; -; - <sup>+</sup> | n.d., n.d., -;<br>n.d., n.d., -; n.d. | all in<br>NODPOP       | all HOM                                          | Perry et al., 2003; Markmann et al., 2008                             |
| <i>symrk-11</i> | SL3472-2                      |                  | G4832 to A                       | G793 to D    | - <sup>+</sup>                                                  | n.d.                                  | NODPOP                 | HOM                                              | Perry et al., 2003                                                    |
| <i>symrk-12</i> | 8-4H                          |                  | insertion in 5'-<br>UTR          | n.d.         | -                                                               | -                                     |                        |                                                  | Sandal et al., 2006                                                   |
| <i>symrk-13</i> | S50-1 <sup>a</sup>            |                  | G3777 to A                       | A620 to T    | (-)                                                             | (-)                                   |                        |                                                  | Murray et al., 2006                                                   |
| <i>symrk-14</i> | B13-B <sup>a</sup>            |                  | C1965 to T                       | P386 to T    | (+)                                                             | (-)                                   |                        |                                                  | Murray et al., 2006                                                   |
| <i>symrk-15</i> | SL0288-3,4                    |                  | G429 to A                        | R64 to K     | + <sup>+</sup> , +                                              | n.d., +                               | both in<br>NODPOP      | HET, HOM                                         | this work                                                             |
| <i>symrk-16</i> | SL1288-1                      |                  | G581 to A                        | V103 to M    | + <sup>+</sup>                                                  | n.d.                                  | GENPOP                 | HET                                              | this work                                                             |
| <i>symrk-17</i> | SL2677-1                      |                  | G722 to A                        | D150 to N    | +                                                               | +                                     | GENPOP                 | HOM                                              | this work                                                             |
| <i>symrk-18</i> | SL1990-1                      |                  | C1292 to T                       | D209 to D    | + <sup>+</sup>                                                  | n.d.                                  | GENPOP                 | HET                                              | this work                                                             |
| <i>symrk-19</i> | SL3461-1                      |                  | G1301 to A                       | W212 to stop | + <sup>+</sup>                                                  | n.d.                                  | GENPOP                 | HET                                              | this work                                                             |
| <i>symrk-20</i> | SL1559-2                      |                  | C1384 to T                       | P240 to L    | +                                                               | n.d.                                  | NODPOP                 | HET                                              | this work                                                             |
| <i>symrk-21</i> | 282-370M1M1                   |                  | A1690 to C                       | Y342 to S    | -                                                               | n.d.                                  | NODPOP+                | HOM                                              | N. Sandal and J. Stougaard, pers. communication; this work            |
| <i>symrk-22</i> | SL0478-1                      |                  | G1890 to A                       | V361 to M    | +                                                               | +                                     | GENPOP                 | HOM                                              | this work                                                             |
| <i>symrk-23</i> | SL1023-1                      |                  | G1911 to A                       | E388 to K    | + <sup>+</sup>                                                  | n.d.                                  | GENPOP                 | HET                                              | this work                                                             |
| <i>symrk-24</i> | SL3006-1                      |                  | A2252 to T                       | I420 to L    | + <sup>+</sup>                                                  | n.d.                                  | GENPOP                 | HET                                              | this work                                                             |
| <i>symrk-25</i> | SL5686-2                      |                  | A2261 to C                       | S423 to R    | +/-                                                             | +                                     | NODPOP                 | HET                                              | this work                                                             |

|                 |                             |            |              |              |                   |                   |             |                                |
|-----------------|-----------------------------|------------|--------------|--------------|-------------------|-------------------|-------------|--------------------------------|
| <i>symrk-26</i> | SL0306-1                    | C3126 to T | L538 to F    | ++           | n.d.              | GENPOP            | HOM         | this work                      |
| <i>symrk-27</i> | SL3001-1                    | G3768 to T | Q617 to stop | -            | -                 | GENPOP            | HET         | this work                      |
| <i>symrk-28</i> | S24-1B <sup>f</sup>         | G3777 to A | A620 to T    | n.d.         | (+)               | NODPOP+           | HOM         | Murray et al., 2006; this work |
| <i>symrk-29</i> | SL5510-2                    | G3810 to A | G631 to R    | +/-*         | n.d.              | NODPOP            | HOM         | this work                      |
| <i>symrk-30</i> | SL0391-2                    | G4155 to T | splice site  | -*           | n.d.              | NODPOP            | HOM         | Perry et al., 2003             |
| <i>symrk-31</i> | SL3489-1                    | C4189 to T | P62 to L     | ++           | n.d.              | GENPOP            | HOM         | this work                      |
| <i>symrk-32</i> | SL1225-1                    | C4192 to T | T693 to I    | ++           | n.d.              | GENPOP            | HET         | this work                      |
| <i>symrk-33</i> | SL1060-1                    | C4360 to T | H709 to Y    | +            | +/-               | GENPOP            | HET         | this work                      |
| <i>symrk-34</i> | SL0140-2                    | G4441 to A | V736 to I    | +/-*         | n.d.              | NODPOP            | HET         | Perry et al., 2003             |
| <i>symrk-35</i> | SL5073-12,13;<br>SL5627-2,3 | G4528 to A | D765 to N    | -,-;<br>-,-* | -,-;<br>n.d.,n.d. | NODPOP;<br>NODPOP | HOM;<br>HOM | this work                      |
| <i>symrk-36</i> | SL3269-1                    | G4780 to A | E776 to K    | ++           | n.d.              | GENPOP            | HOM         | this work                      |
| <i>symrk-37</i> | SL1538-1                    | G4787 to A | S778 to N    | ++           | n.d.              | GENPOP            | HET         | this work                      |
| <i>symrk-38</i> | SL1849-1                    | G4825 to A | V791 to M    | ++           | n.d.              | GENPOP            | HET         | this work                      |
| <i>symrk-39</i> | SL1959-1                    | C5255 to T | P851 to L    | ++           | n.d.              | GENPOP            | HET         | this work                      |
| <i>symrk-40</i> | SL0265-3,4                  | G5270 to A | R856 to K    | -,-*         | -,-n.d.           | both in<br>NODPOP | both HOM    | this work                      |
| <i>symrk-41</i> | SL0783-1                    | G700 to A  | E142 to E    | ++           | n.d.              | GENPOP            | HET         | this work                      |
| <i>symrk-42</i> | SL0193-1;<br>SL0210-1       | C1335 to T | L224 to L    | ++;+*        | n.d.;n.d.         | GENPOP;<br>GENPOP | HET; HET    | this work                      |
| <i>symrk-43</i> | SL1401-1                    | G1421 to A | E252 to E    | ++           | n.d.              | GENPOP            | HET         | this work                      |
| <i>symrk-44</i> | SL0798-1                    | G3677 to A | L586 to L    | ++           | n.d.              | GENPOP            | HOM         | this work                      |
| <i>symrk-45</i> | SL0275-3                    | G3809 to A | Q630 to Q    | ++           | n.d.              | NODPOP            | HOM         | this work                      |
| <i>symrk-46</i> | SL6805-3                    | C4800 to T | S782 to S    | -*           | n.d.              | NODPOP            | HET         | this work                      |
| <i>symrk-47</i> | SL1813-1                    | C5202 to T | Y633 to Y    | ++           | n.d.              | GENPOP            | HET         | this work                      |
| <i>symrk-48</i> | SL1824-1                    | C289 to T  | intron 1     | ++           | n.d.              | GENPOP            | HET         | this work                      |
| <i>symrk-49</i> | SL0978-1                    | C1817 to T | intron 3     | ++           | n.d.              | GENPOP            | HET         | this work                      |
| <i>symrk-50</i> | SL1153-3                    | C1846 to T | intron 3     | ++           | n.d.              | NODPOP            | HET         | this work                      |
| <i>symrk-51</i> | SL0710-1                    | C1879 to T | intron 3     | ++           | n.d.              | GENPOP            | HET         | this work                      |
| <i>symrk-52</i> | SL1084-1                    | C2053 to T | intron 4     | ++           | n.d.              | GENPOP            | HET         | this work                      |
| <i>symrk-53</i> | SL2023-1                    | G2353 to A | intron 5     | ++           | n.d.              | GENPOP            | HOM         | this work                      |
| <i>symrk-54</i> | SL0470-1;<br>SL0825-1       | C3213 to T | intron 9     | ++;+*        | n.d.;n.d.         | GENPOP;<br>GENPOP | HET; HET    | this work                      |
| <i>symrk-55</i> | SL0759-2                    | C4083 to T | intron 11    | -*           | +                 | NODPOP            | HET         | this work                      |
| <i>symrk-56</i> | SL0838-1;<br>SL1599-1       | C4105 to T | intron 11    | ++;+         | n.d.;+            | GENPOP;<br>GENPOP | HET; HET    | this work                      |
| <i>symrk-57</i> | SL1532-1                    | G4306 to A | intron 12    | ++           | n.d.              | GENPOP            | HET         | this work                      |
| <i>symrk-58</i> | SL1749-1                    | G4308 to A | intron 12    | ++           | n.d.              | GENPOP            | HET         | this work                      |
| <i>symrk-59</i> | SL1913-7 <sup>a</sup>       | G4653 to A | intron 14    | (+/-)        | (+)               | NODPOP            | HET         | this work                      |
| <i>symrk-60</i> | SL1739-1,<br>SL1846-1       | C4960 to T | intron 14    | ++;+*        | n.d.;n.d.         | GENPOP;<br>GENPOP | HET; HET    | this work                      |

<sup>a</sup> The *SYMRK* genomic sequence is deposited to GenBank under accession number AP004579 and is used as *Lotus japonicus* MG20 reference. Adenine of the ATG initiator codon is designated as position 1.

- <sup>b</sup> Phenotypes that are scored only in the initial M<sub>2</sub> generation are denoted by \*; no star denotes additional screening in the M<sub>3</sub> generation. In the AM phenotype "+/-" designates the appearance of balloon-like structures. Annotations in brackets indicate lines harbouring more than one mutation in nodulation genes.
- <sup>c</sup> Genotype of progenitor or mutant plant in the M<sub>2</sub> generation is given as HOM = homozygous or HET = heterozygous with respect to the mutant allele.
- <sup>d</sup> Lines SL0605-2,3 carry the mutant alleles *nin-11* and *symrk-9*.
- <sup>e</sup> Lines contain in addition a *har1-1* mutation.
- <sup>f</sup> Line S24-1B carries the mutant alleles *pollux-15* and *symrk-28*.
- <sup>g</sup> Line SL1913-7 carries the mutant alleles *pollux-24* and *symrk-59*.

**References:**

- Demchenko K, Winzer T, Stougaard J, Parniske M, Pawlowski K (2004) Distinct roles of *Lotus japonicus* SYMRK and SYM15 in root colonization and arbuscule formation. *New Phytol* **163**: 381-392
- Heckmann AB, Lombardo F, Miwa H, Perry JA, Bunnewell S, Parniske M, Wang TL, Downie JA (2006) *Lotus japonicus* nodulation requires two GRAS domain regulators, one of which is functionally conserved in a non-legume. *Plant Physiol* **142**: 1739-1750
- Imaizumi-Anraku H, Takeda N, Charpentier M, Perry J, Miwa H, Umehara Y, Kouchi H, Murakami Y, Mulder L, Vickers K, Pike J, Downie JA, Wang T, Sato S, Asamizu E, Tabata S, Yoshikawa M, Murooka Y, Wu G-J, Kawaguchi M, Kawasaki S, Parniske M, Hayashi M (2005) Plastid proteins crucial for symbiotic fungal and bacterial entry into plant roots. *Nature* **433**: 527-531
- Kanamori N, Madsen LH, Radutoiu S, Frantescu M, Quistgaard EM, Miwa H, Downie JA, James EK, Felle HH, Haaning LL, Jensen TH, Sato S, Nakamura Y, Tabata S, Sandal N, Stougaard J (2006) A nucleoporin is required for induction of Ca<sup>2+</sup> spiking in legume nodule development and essential for rhizobial and fungal symbiosis. *Proc Natl Acad Sci USA* **103**: 359-364
- Kawaguchi M, Imaizumi-Anraku H, Koiwa H, Niwa S, Ikuta A, Syono K, Akao S (2002) Root, root hair, and symbiotic mutants of the model legume *Lotus japonicus*. *Mol Plant-Microbe Interact* **15**: 17-26
- Kistner C, Winzer T, Pitzschke A, Mulder L, Sato S, Kaneko T, Tabata S, Sandal N, Stougaard J, Webb KJ, Szczyglowski K, Parniske M (2005) Seven *Lotus japonicus* genes required for transcriptional reprogramming of the root during fungal and bacterial symbiosis. *Plant Cell* **17**: 2217-2229
- Madsen EB, Madsen LH, Radutoiu S, Olbryt M, Rakwalska M, Szczyglowski K, Sato S, Kaneko T, Tabata S, Sandal N, Stougaard J (2003) A receptor kinase gene of the LysM type is involved in legume perception of rhizobial signals. *Nature* **425**: 637-640
- Markmann K, Giczey G, Parniske M (2008) Functional adaptation of a plant receptor-kinase paved the way for the evolution of intracellular root symbioses with bacteria. *PLoS Biol* **6**: e68
- Murakami Y, Miwa H, Imaizumi-Anraku H, Kouchi H, Downie JA, Kawaguchi M, Kawasaki S (2007) Positional cloning identifies *Lotus japonicus* NSP2, a putative transcription factor of the GRAS family, required for *NIN* and *ENOD40* gene expression in nodule initiation. *DNA Res* **13**: 255-265
- Murray J, Karas B, Ross L, Brachmann A, Wagg C, Geil R, Perry J, Nowakowski K, MacGillivray M, Held M, Stougaard J, Peterson L, Parniske M, Szczyglowski K (2006) Genetic suppressors of the *Lotus japonicus* *har1-1* hypermodulation phenotype. *Mol Plant-Microbe Interact* **19**: 1082-1091
- Perry JA, Wang TL, Welham TJ, Gardner S, Pike JM, Yoshida S, Parniske M (2003) A TILLING reverse genetics tool and a web-accessible collection of mutants of the legume *Lotus japonicus*. *Plant Physiol* **131**: 866-871
- Radutoiu S, Madsen LH, Madsen EB, Felle HH, Umehara Y, Grønlund M, Sato S, Nakamura Y, Tabata S, Sandal N, Stougaard J (2003) Plant recognition of symbiotic bacteria requires two LysM receptor-like kinases. *Nature* **425**: 585-592
- Saito K, Yoshikawa M, Yano K, Miwa H, Uchida H, Asamizu E, Sato S, Tabata S, Imaizumi-Anraku H, Umehara Y, Kouchi H, Murooka Y, Szczyglowski K, Downie JA, Parniske M, Hayashi M, Kawaguchi M (2007) NUCLEOPORIN85 is required for calcium spiking, fungal and bacterial symbioses, and seed production in *Lotus japonicus*. *Plant Cell* **19**: 610-624
- Sandal N, Petersen TR, Murray J, Umehara Y, Karas B, Yano K, Kumagai H, Yoshikawa M, Saito K, Hayashi M, Murakami Y, Wang X, Hakoyama T, Imaizumi-Anraku H, Sato S, Kato T, Chen W, Hossain MS, Shibata S, Wang TL, Yokota K, Larsen K, Kanamori N, Madsen E, Radutoiu S, Madsen LH, Radu TG, Krusell L, Ooki Y, Banba M, Betti M, Rispaill N, Skøt L, Tuck E, Perry J, Yoshida S, Vickers K, Pike J, Mulder L, Charpentier M, Müller J, Ohtomo R, Kojima T, Ando S, Marquez AJ, Gresshoff PM, Harada K, Webb J, Hata S, Suganuma N, Kouchi H, Kawasaki S, Tabata S, Hayashi M, Parniske M, Szczyglowski K, Kawaguchi M, Stougaard J (2006) Genetics of symbiosis in *Lotus japonicus*: Recombinant inbred lines, comparative genetic maps, and map position of 35 symbiotic loci. *Mol Plant-Microbe Interact* **19**: 80-91
- Schauser L, Handberg K, Sandal N, Stiller J, Thykjær T, Pajuelo E, Nielsen A, Stougaard J (1998) Symbiotic mutants deficient in nodule establishment identified after T-DNA transformation of *Lotus japonicus*. *Mol Gen Genet* **259**: 414-423
- Schauser L, Roussis A, Stiller J, Stougaard J (1999) A plant regulator controlling development of symbiotic root nodules. *Nature* **402**: 191-195
- Senoo K, Solaiman MZ, Kawaguchi M, Imaizumi-Anraku H, Akao S, Tanaka A, Obata H (2000) Isolation of two different phenotypes of mycorrhizal mutants in the model legume plant *Lotus japonicus* after EMS-treatment. *Plant Cell Physiol* **41**: 726-732
- Stracke S, Kistner C, Yoshida S, Mulder L, Sato S, Kaneko T, Tabata S, Sandal N, Stougaard J, Szczyglowski K, Parniske M (2002) A plant receptor-like kinase required for both bacterial and fungal symbiosis. *Nature* **417**: 959-962
- Szczyglowski K, Shaw RS, Wopereis J, Copeland S, Hamburger D, Kasiborski B, Dazzo FB, de Bruijn FJ (1998) Nodule organogenesis and symbiotic mutants of the model legume *Lotus japonicus*. *Mol Plant-Microbe Interact* **11**: 684-697
- Tirichine L, Imaizumi-Anraku H, Yoshida S, Murakami Y, Madsen LH, Miwa H, Nakagawa T, Sandal N, Albrektsen AS, Kawaguchi M, Downie A, Sato S, Tabata S, Kouchi H, Parniske M, Kawasaki S, Stougaard J (2006a) Deregulation of a Ca<sup>2+</sup>/calmodulin-dependent kinase leads to spontaneous nodule development. *Nature* **441**: 1153-1156
- Tirichine L, James EK, Sandal N, Stougaard J (2006b) Spontaneous root-nodule formation in the model legume *Lotus japonicus*: a novel class of mutants nodulates in the absence of rhizobia. *Mol Plant-Microbe Interact* **19**: 373-382
- Yano K, Tansengco ML, Hio T, Higashi K, Murooka Y, Imaizumi-Anraku H, Kawaguchi M, Hayashi M (2006) New nodulation mutants responsible for infection thread development in *Lotus japonicus*. *Mol Plant-Microbe Interact* **19**: 801-810
- Yano K, Yoshida S, Müller J, Singh S, Banba M, Vickers K, Markmann K, White C, Schuller B, Sato S, Asamizu E, Tabata S, Murooka Y, Perry J, Wang TL, Kawaguchi M, Imaizumi-Anraku H, Hayashi M, Parniske M (2008) CYCLOPS, a mediator of symbiotic intracellular accommodation. *Proc Natl Acad Sci USA* **105**: 20540-20545

**Supplemental Fig. S4. BLOSUM62 table with amino acid changes.**

|   | A  | C  | D  | E  | F  | G  | H  | I  | K  | L  | M  | N  | P  | Q  | R  | S  | T  | V  | W  | Y  | *  |
|---|----|----|----|----|----|----|----|----|----|----|----|----|----|----|----|----|----|----|----|----|----|
| A | 4  | 0  | -2 | -1 | -2 | 0  | -2 | -1 | -1 | -1 | -1 | -2 | -1 | -1 | -1 | 1  | 0  | 0  | -3 | -2 | -4 |
| C | 0  | 9  | -3 | -4 | -2 | -3 | -3 | -1 | -3 | -1 | -1 | -3 | -3 | -3 | -3 | -1 | -1 | -1 | -2 | -2 | -4 |
| D | -2 | -3 | 6  | 2  | -3 | -1 | -1 | -3 | -1 | -4 | -3 | 1  | -1 | 0  | -2 | 0  | -1 | -3 | -4 | -3 | -4 |
| E | -1 | -4 | 2  | 5  | -3 | -2 | 0  | -3 | 1  | -3 | -2 | 0  | -1 | 2  | 0  | 0  | -1 | -2 | -3 | -2 | -4 |
| F | -2 | -2 | -3 | -3 | 6  | -3 | -1 | 0  | -3 | 0  | 0  | -3 | -4 | -3 | -3 | -2 | -2 | -1 | 1  | 3  | -4 |
| G | 0  | -3 | -1 | -2 | -3 | 6  | -2 | -4 | -2 | -4 | -3 | 0  | -2 | -2 | -2 | 0  | -2 | -3 | -2 | -3 | -4 |
| H | -2 | -3 | -1 | 0  | -1 | -2 | 8  | -3 | -1 | -3 | -2 | 1  | -2 | 0  | 0  | -1 | -2 | -3 | -2 | 2  | -4 |
| I | -1 | -1 | -3 | -3 | 0  | -4 | -3 | 4  | -3 | 2  | 1  | -3 | -3 | -3 | -3 | -2 | -1 | 3  | -3 | -1 | -4 |
| K | -1 | -3 | -1 | 1  | -3 | -2 | -1 | -3 | 5  | -2 | -1 | 0  | -1 | 1  | 2  | 0  | -1 | -2 | -3 | -2 | -4 |
| L | -1 | -1 | -4 | -3 | 0  | -4 | -3 | 2  | -2 | 4  | 2  | -3 | -3 | -2 | -2 | -2 | -1 | 1  | -2 | -1 | -4 |
| M | -1 | -1 | -3 | -2 | 0  | -3 | -2 | 1  | -1 | 2  | 5  | -2 | -2 | 0  | -1 | -1 | -1 | 1  | -1 | -1 | -4 |
| N | -2 | -3 | 1  | 0  | -3 | 0  | 1  | -3 | 0  | -3 | -2 | 6  | -2 | 0  | 0  | 1  | 0  | -3 | -4 | -2 | -4 |
| P | -1 | -3 | -1 | -1 | -4 | -2 | -2 | -3 | -1 | -3 | -2 | -2 | 7  | -1 | -2 | -1 | -1 | -2 | -4 | -3 | -4 |
| Q | -1 | -3 | 0  | 2  | -3 | -2 | 0  | -3 | 1  | -2 | 0  | 0  | -1 | 5  | 1  | 0  | -1 | -2 | -2 | -1 | -4 |
| R | -1 | -3 | -2 | 0  | -3 | -2 | 0  | -3 | 2  | -2 | -1 | 0  | -2 | 1  | 5  | -1 | -1 | -3 | -3 | -2 | -4 |
| S | 1  | -1 | 0  | 0  | -2 | 0  | -1 | -2 | 0  | -2 | -1 | 1  | -1 | 0  | -1 | 4  | 1  | -2 | -3 | -2 | -4 |
| T | 0  | -1 | -1 | -1 | -2 | -2 | -2 | -1 | -1 | -1 | -1 | 0  | -1 | -1 | -1 | 1  | 5  | 0  | -2 | -2 | -4 |
| V | 0  | -1 | -3 | -2 | -1 | -3 | -3 | 3  | -2 | 1  | 1  | -3 | -2 | -2 | -3 | -2 | 0  | 4  | -3 | -1 | -4 |
| W | -3 | -2 | -4 | -3 | 1  | -2 | -2 | -3 | -3 | -2 | -1 | -4 | -4 | -2 | -3 | -3 | -2 | -3 | 11 | 2  | -4 |
| Y | -2 | -2 | -3 | -2 | 3  | -3 | 2  | -1 | -2 | -1 | -1 | -2 | -3 | -1 | -2 | -2 | -2 | -1 | 2  | 7  | -4 |
| * | -4 | -4 | -4 | -4 | -4 | -4 | -4 | -4 | -4 | -4 | -4 | -4 | -4 | -4 | -4 | -4 | -4 | -4 | -4 | -4 | 1  |

The original amino acids are given in rows, the substituted amino acids in columns. The star symbol (\*) designates stop codons. Changes that can be caused by EMS are indicated in colour: orange, non-synonymous exchange; red, nonsense mutation. Light green shading denotes synonymous exchanges, grey shading all additional non-synonymous changes or nonsense mutations that could be achieved by a single nucleotide exchange. Note that only a small fraction of the possible mutational spectrum is explored by EMS mutagenesis.

**Supplemental Table S1. Mutation types by nucleotide change detected in GENPOP and NODPOP populations.**

| Change | GENPOP          |                 | NODPOP <sup>1</sup> |                 | Total           |                 |
|--------|-----------------|-----------------|---------------------|-----------------|-----------------|-----------------|
|        | Absolute number | Relative number | Absolute number     | Relative number | Absolute number | Relative number |
| G to A | 298             | 51.8%           | 34                  | 72.9%           | 332             | 53.3%           |
| C to T | 264             | 45.8%           | 10                  | 20.8%           | 274             | 44.0%           |
| A to G | 1               | 0.17%           |                     |                 | 1               | 0.16%           |
| A to T | 3               | 0.52%           |                     |                 | 3               | 0.48%           |
| C to G | 1               | 0.17%           |                     |                 | 1               | 0.16%           |
| G to C | 1               | 0.17%           |                     |                 | 1               | 0.16%           |
| G to T | 3               | 0.52%           | 1                   | 2.1%            | 4               | 0.64%           |
| T to C | 4               | 0.69%           |                     |                 | 4               | 0.64%           |
| T to G | 1               | 0.17%           |                     |                 | 1               | 0.16%           |
| G del. |                 |                 | 1                   | 2.1%            | 1               | 0.16%           |
| C del. |                 |                 | 1                   | 2.1%            | 1               | 0.16%           |
| Sum    | 576             | 100%            | 47                  | 100%            | 623             | 100%            |

<sup>1</sup> Numbers for the NODPOP population are for nodulation genes only, include only potentially causative mutations in families with clear nodulation phenotype (see Supplementary Table 3 and Supplementary Figure 2), and exclude siblings.

**Supplemental Table S2. Distribution of mutation types detected in nodulation genes in the complete NODPOP by TILLING.**

| Gene           | TILLed (in bp) |               |               | Mutations detected in NODPOP by TILLING |                       |                   |                       |              |
|----------------|----------------|---------------|---------------|-----------------------------------------|-----------------------|-------------------|-----------------------|--------------|
|                | Total          | Coding        | Non-coding    | Total                                   | Homozygous non-silent | Homozygous silent | Homozygous non-coding | Heterozygous |
| <i>CASTOR</i>  | 5575           | 2474          | 3101          | 13                                      | 9                     |                   | 1                     | 3            |
| <i>CCaMK</i>   | 3973           | 1641          | 2332          | 5                                       | 1                     |                   | 1                     | 3            |
| <i>CYCLOPS</i> | 4214           | 1557          | 2657          | 3                                       | 2                     |                   |                       | 1            |
| <i>NFR1</i>    | 5557           | 1866          | 3691          | 8                                       | 4                     |                   | 1                     | 3            |
| <i>NFR5</i>    | 1795           | 1788          | 7             | 5                                       | 4                     |                   |                       | 1            |
| <i>NIN</i>     | 3047           | 2587          | 460           | 5                                       | 3                     |                   |                       | 2            |
| <i>NSP1</i>    | 1444           | 1444          | 0             | 3                                       | 1                     | 1                 |                       | 1            |
| <i>NSP2</i>    | 1440           | 1440          | 0             | 4                                       | 2                     |                   |                       | 2            |
| <i>NUP85</i>   | 8391           | 2136          | 6255          | 3                                       | 1                     |                   | 1                     | 1            |
| <i>NUP133</i>  | 6353           | 3842          | 2511          | 8                                       | 2                     | 1                 |                       | 5            |
| <i>POLLUX</i>  | 6535           | 2754          | 3781          | 22                                      | 12                    | 1                 | 1                     | 8            |
| <i>SYMRK</i>   | 5365           | 3282          | 2083          | 18                                      | 10                    | 1                 |                       | 7            |
| <b>Sum</b>     | <b>53,689</b>  | <b>26,811</b> | <b>26,878</b> | <b>97</b>                               | <b>51</b>             | <b>4</b>          | <b>5</b>              | <b>37</b>    |

**Supplemental Table S3. Alleles in nodulation genes with potentially causative mutations in the nodulation-deficient NODPOP, ordered by mutation type.**

| Allele           | NODPOP family | Mutation                  | Nucleotide change      |
|------------------|---------------|---------------------------|------------------------|
| <i>nfr1-10</i>   | SL1174        | A <sub>350</sub> to T     | G <sub>2941</sub> to A |
| <i>castor-14</i> | SL1715        | A <sub>760</sub> to T     | G <sub>9871</sub> to A |
| <i>castor-13</i> | SL0820        | D <sub>444</sub> to N     | G <sub>2672</sub> to A |
| <i>symrk-10</i>  | SL1951        | D <sub>738</sub> to N     | G <sub>4447</sub> to A |
| <i>symrk-35</i>  | SL5073        | D <sub>765</sub> to N     | G <sub>4528</sub> to A |
| <i>symrk-35</i>  | SL5627        | D <sub>765</sub> to N     | G <sub>4528</sub> to A |
| <i>nin-11</i>    | SL0605        | E <sub>540</sub> to K     | G <sub>1848</sub> to A |
| <i>pollux-9</i>  | SL0405        | E <sub>830</sub> to K     | G <sub>5634</sub> to A |
| <i>castor-26</i> | SL6908        | G <sub>274</sub> to D     | G <sub>1088</sub> to A |
| <i>symrk-11</i>  | SL3472        | G <sub>793</sub> to D     | G <sub>4832</sub> to A |
| <i>castor-16</i> | SL3160        | G <sub>383</sub> to E     | G <sub>1655</sub> to A |
| <i>nfr1-6</i>    | SL5426        | G <sub>485</sub> to E     | G <sub>4377</sub> to A |
| <i>pollux-7</i>  | SL1899        | G <sub>530</sub> to E     | G <sub>2313</sub> to A |
| <i>pollux-17</i> | SL1657        | G <sub>301</sub> to E     | G <sub>1147</sub> to A |
| <i>nfr5-8</i>    | SL1719        | G <sub>264</sub> to R     | G <sub>790</sub> to A  |
| <i>symrk-9</i>   | SL0605        | G <sub>604</sub> to R     | G <sub>3729</sub> to A |
| <i>symrk-29</i>  | SL5510        | G <sub>631</sub> to R     | G <sub>3810</sub> to A |
| <i>symrk-8</i>   | SL0160        | G <sub>759</sub> to R     | G <sub>4510</sub> to A |
| <i>pollux-10</i> | SL1070        | G <sub>882</sub> to S     | G <sub>6021</sub> to A |
| <i>nfr1-11</i>   | SL1977        | Q <sub>316</sub> to stop  | C <sub>2412</sub> to T |
| <i>nfr5-3</i>    | SL3257        | Q <sub>55</sub> to stop   | C <sub>163</sub> to T  |
| <i>nsp2-3</i>    | SL0781        | Q <sub>244</sub> to stop  | C <sub>730</sub> to T  |
| <i>nup133-11</i> | SL5179        | Q <sub>271</sub> to stop  | C <sub>1097</sub> to T |
| <i>nup133-12</i> | SL0443        | Q <sub>1140</sub> to stop | C <sub>5874</sub> to T |
| <i>castor-17</i> | SL6812        | R <sub>590</sub> to H     | G <sub>3738</sub> to A |
| <i>symrk-40</i>  | SL0265        | R <sub>856</sub> to K     | G <sub>5270</sub> to A |
| <i>cyclops-6</i> | SL0488        | R <sub>74</sub> to stop   | C <sub>752</sub> to T  |
| <i>nup85-6</i>   | SL0948        | S <sub>235</sub> to F     | C <sub>2701</sub> to T |
| <i>pollux-6</i>  | SL5691        | S <sub>322</sub> to F     | C <sub>1210</sub> to T |
| <i>castor-15</i> | SL1966        | T <sub>249</sub> to I     | C <sub>1013</sub> to T |
| <i>pollux-23</i> | SL4162        | T <sub>116</sub> to I     | C <sub>347</sub> to T  |
| <i>nin-9</i>     | SL5369        | V <sub>258</sub> to M     | G <sub>1002</sub> to A |
| <i>nin-9</i>     | SL5426        | V <sub>258</sub> to M     | G <sub>1002</sub> to A |
| <i>castor-5</i>  | SL1937        | W <sub>483</sub> to stop  | G <sub>3053</sub> to A |
| <i>castor-12</i> | SL3251        | W <sub>93</sub> to stop   | G <sub>279</sub> to A  |
| <i>ccamk-8</i>   | SL0820        | W <sub>336</sub> to stop  | G <sub>3920</sub> to A |
| <i>pollux-5</i>  | SL3130        | W <sub>320</sub> to stop  | G <sub>1204</sub> to A |
| <i>pollux-8</i>  | SL0159        | W <sub>780</sub> to stop  | G <sub>5486</sub> to A |
| <i>pollux-20</i> | SL0729        | W <sub>651</sub> to stop  | G <sub>3388</sub> to A |
| <i>castor-27</i> | SL5136        | Splice site               | G <sub>1503</sub> to A |
| <i>nfr1-7</i>    | SL0355        | Splice site               | G <sub>5331</sub> to A |
| <i>pollux-16</i> | SL5998        | Splice site               | G <sub>496</sub> to A  |
| <i>pollux-19</i> | SL5821        | Splice site               | G <sub>1644</sub> to A |
| <i>pollux-21</i> | SL1075        | Splice site               | G <sub>3416</sub> to A |
| <i>symrk-30</i>  | SL0391        | Splice site               | G <sub>4155</sub> to T |
| <i>nfr5-6</i>    | SL5426        | Frame shift               | C <sub>237</sub> del.  |
| <i>cyclops-5</i> | SL1347        | Frame shift               | G <sub>3508</sub> del. |



**Supplemental Table S4. Expected and observed occurrence of non-synonymous and nonsense amino acid exchanges in EMS alleles in different populations.**

| Amino acid | GENPOP <sup>1</sup> |          | NODPOP <sup>2</sup> |          | RPM1 <sup>3</sup> |          |
|------------|---------------------|----------|---------------------|----------|-------------------|----------|
|            | Expected            | Observed | Expected            | Observed | Expected          | Observed |
| A          | 15.4                | 11       | 5.6                 | 2        | 6.3               | 4        |
| C          | 1.6                 | 0        | 0.8                 | 0        | 0.9               | 0        |
| D          | 6.5                 | 12       | 2.3                 | 4        | 3.0               | 0        |
| E          | 7.5                 | 10       | 2.9                 | 2        | 4.6               | 4        |
| G          | 16.0                | 20       | 5.3                 | 11       | 6.5               | 13       |
| H          | 2.7                 | 2        | 0.9                 | 0        | 1.7               | 0        |
| L          | 4.6                 | 6        | 1.7                 | 0        | 3.3               | 7        |
| M          | 2.5                 | 0        | 0.9                 | 0        | 2.2               | 0        |
| P          | 10.5                | 12       | 3.7                 | 0        | 4.2               | 8        |
| Q          | 3.6                 | 2        | 1.6                 | 5        | 2.1               | 3        |
| R          | 8.4                 | 5        | 3.0                 | 3        | 5.7               | 2        |
| S          | 6.5                 | 5        | 4.3                 | 2        | 5.1               | 5        |
| T          | 5.6                 | 2        | 2.1                 | 1        | 2.9               | 2        |
| V          | 7.7                 | 9        | 2.7                 | 2        | 4.1               | 2        |
| W          | 3.1                 | 4        | 1.2                 | 6        | 2.4               | 5        |
| Total      | 102                 | 102      | 39                  | 39       | 55                | 55       |

<sup>1</sup> Numbers for the GENPOP population are from a total of 11,718 bp from 14 genes with a variety of functions that were screened on GENPOP for mutations.

<sup>2</sup> Numbers for the NODPOP population are for potentially causative non-synonymous and nonsense mutations in nodulation genes only (see Supplementary Table 3).

<sup>3</sup> Numbers for RPM1 are from Tornero *et al.* (2002).
